# Supplementary material for: High prevalence of atypical virulotype and genetically diverse background among Pseudomonas aeruginosa isolates from a referral hospital in the Brazilian Amazon
Source: PubMed Central journal article supplement (PMC7482967; doi:10.1371/journal.pone.0238741), 2020-09-10

# PLOS ONE

## High prevalence of atypical virulotype and genetically diverse background among *Pseudomonas aeruginosa* isolates from a referral hospital in the Brazilian Amazon --Manuscript Draft--

|                              |                                                                                                                                                                                                                                                                                                                                                                                                                                                                                                                                                                                                                                                                                                                                                                                                                                                                                                                                                                                                                                                                                                                                                                                                                                                                                                                                                                                                                                                                                                                                                                                                                                                                                                                                                                                                                                                                                                                                                                                                                                                                                                                                                                                                                                                                                                 |
|------------------------------|-------------------------------------------------------------------------------------------------------------------------------------------------------------------------------------------------------------------------------------------------------------------------------------------------------------------------------------------------------------------------------------------------------------------------------------------------------------------------------------------------------------------------------------------------------------------------------------------------------------------------------------------------------------------------------------------------------------------------------------------------------------------------------------------------------------------------------------------------------------------------------------------------------------------------------------------------------------------------------------------------------------------------------------------------------------------------------------------------------------------------------------------------------------------------------------------------------------------------------------------------------------------------------------------------------------------------------------------------------------------------------------------------------------------------------------------------------------------------------------------------------------------------------------------------------------------------------------------------------------------------------------------------------------------------------------------------------------------------------------------------------------------------------------------------------------------------------------------------------------------------------------------------------------------------------------------------------------------------------------------------------------------------------------------------------------------------------------------------------------------------------------------------------------------------------------------------------------------------------------------------------------------------------------------------|
| <b>Manuscript Number:</b>    | PONE-D-20-15488                                                                                                                                                                                                                                                                                                                                                                                                                                                                                                                                                                                                                                                                                                                                                                                                                                                                                                                                                                                                                                                                                                                                                                                                                                                                                                                                                                                                                                                                                                                                                                                                                                                                                                                                                                                                                                                                                                                                                                                                                                                                                                                                                                                                                                                                                 |
| <b>Article Type:</b>         | Research Article                                                                                                                                                                                                                                                                                                                                                                                                                                                                                                                                                                                                                                                                                                                                                                                                                                                                                                                                                                                                                                                                                                                                                                                                                                                                                                                                                                                                                                                                                                                                                                                                                                                                                                                                                                                                                                                                                                                                                                                                                                                                                                                                                                                                                                                                                |
| <b>Full Title:</b>           | High prevalence of atypical virulotype and genetically diverse background among <i>Pseudomonas aeruginosa</i> isolates from a referral hospital in the Brazilian Amazon                                                                                                                                                                                                                                                                                                                                                                                                                                                                                                                                                                                                                                                                                                                                                                                                                                                                                                                                                                                                                                                                                                                                                                                                                                                                                                                                                                                                                                                                                                                                                                                                                                                                                                                                                                                                                                                                                                                                                                                                                                                                                                                         |
| <b>Short Title:</b>          | Virulence, antimicrobial resistance and genotyping of <i>Pseudomonas aeruginosa</i>                                                                                                                                                                                                                                                                                                                                                                                                                                                                                                                                                                                                                                                                                                                                                                                                                                                                                                                                                                                                                                                                                                                                                                                                                                                                                                                                                                                                                                                                                                                                                                                                                                                                                                                                                                                                                                                                                                                                                                                                                                                                                                                                                                                                             |
| <b>Corresponding Author:</b> | YAN CORREA RODRIGUES<br>Universidade do Estado do Para<br>Belém, Pará BRAZIL                                                                                                                                                                                                                                                                                                                                                                                                                                                                                                                                                                                                                                                                                                                                                                                                                                                                                                                                                                                                                                                                                                                                                                                                                                                                                                                                                                                                                                                                                                                                                                                                                                                                                                                                                                                                                                                                                                                                                                                                                                                                                                                                                                                                                    |
| <b>Keywords:</b>             | <i>Pseudomonas aeruginosa</i> ; virulence; <i>exoU</i> ; antimicrobial resistance, genotyping; MLST                                                                                                                                                                                                                                                                                                                                                                                                                                                                                                                                                                                                                                                                                                                                                                                                                                                                                                                                                                                                                                                                                                                                                                                                                                                                                                                                                                                                                                                                                                                                                                                                                                                                                                                                                                                                                                                                                                                                                                                                                                                                                                                                                                                             |
| <b>Abstract:</b>             | <p><i>Pseudomonas aeruginosa</i> is an opportunistic pathogen causing different types of infections, particularly in intensive care unit patients. Characteristics that favor its persistence artificial environments are related to its high adaptability, wide arsenal of virulence factors and resistance to several antimicrobials classes. Among the several virulence determinants, T3SS stands as the most important due to the clinical impact of <i>exoS</i> and <i>exoU</i> genes in patient's outcome. The molecular characterization of <i>P. aeruginosa</i> isolates helps in the comprehension of transmission dynamics and enhance knowledge of virulence and resistance roles in infection process. In the present study, we investigated virulence and resistance properties and the genetic background of <i>P. aeruginosa</i> isolated from ICUs patients at a referral hospital in Brazilian Amazon. A total of 54 <i>P. aeruginosa</i> isolates were characterized by detecting 19 virulence-related genes, antimicrobial susceptibility testing, molecular detection of <math>\beta</math>-lactamase-encoding genes and genotyping by MLST and rep-PCR. Our findings showed high prevalence of virulence-related markers, where 53.7% of the isolates presented at least 17 genes among the 19 investigated ( <math>P = 0.01</math>). The rare <i>exoS</i> + <i>exoU</i> + cytotoxic virulotype was detected in 55.6% of isolates. Antimicrobial susceptibility testing revealed percentages of antibiotic resistance above 50% to carbapenems, cephalosporins and fluoroquinolones associated to MDR/XDR isolates. Isolates harboring both <i>bla</i> SPM-1 and <i>bla</i> OXA genes were also detected. Genotyping methods demonstrated a wide genetic diversity of strains spread among the different intensive care units, circulation of international MDR/XDR high-risk clones (ST111, ST235, ST244 and ST277) and emergence of seven novel MLST lineages. Finally, our findings highlight the spread of strains with high virulence potential and resistance to antimicrobials and may be useful on comprehension of pathogenicity process, treatment guidance and establishment of strategies to control the spread of epidemic <i>P. aeruginosa</i> strains.</p> |
| <b>Order of Authors:</b>     | <p>Yan Corrêa Rodrigues</p> <p>Ismari Perini Furlaneto</p> <p>Arthur Henrique Pinto Marciel</p> <p>Ana Judith Pires Garcia Quaresma</p> <p>Eliseth Costa Oliveira de Matos</p> <p>Marília Lima Conceição</p> <p>Marcelo Cleyton da Silva Vieira</p> <p>Giulia Leão da Cunha Brabo</p> <p>Edilene do Socorro Nascimento Falcão Sarges</p> <p>Luana Nepomuceno Godim Costa Lima</p> <p>Karla Valéria Batista Lima</p>                                                                                                                                                                                                                                                                                                                                                                                                                                                                                                                                                                                                                                                                                                                                                                                                                                                                                                                                                                                                                                                                                                                                                                                                                                                                                                                                                                                                                                                                                                                                                                                                                                                                                                                                                                                                                                                                             |

| Additional Information:                                                                                                                                                                                                                                                                                                                                                                                                                                                                                                                                                                                                                                                                                                                                                                                                                                                                                                                                                                                                                                                                                                                                                                                                                                                                                                                                                                                                                                                                                                                                                                                                                                                                                                                              |                                                                                                                                                                                                                                                                                                                                                                                                                                                                                                                                                                                                                                                                                 |
|------------------------------------------------------------------------------------------------------------------------------------------------------------------------------------------------------------------------------------------------------------------------------------------------------------------------------------------------------------------------------------------------------------------------------------------------------------------------------------------------------------------------------------------------------------------------------------------------------------------------------------------------------------------------------------------------------------------------------------------------------------------------------------------------------------------------------------------------------------------------------------------------------------------------------------------------------------------------------------------------------------------------------------------------------------------------------------------------------------------------------------------------------------------------------------------------------------------------------------------------------------------------------------------------------------------------------------------------------------------------------------------------------------------------------------------------------------------------------------------------------------------------------------------------------------------------------------------------------------------------------------------------------------------------------------------------------------------------------------------------------|---------------------------------------------------------------------------------------------------------------------------------------------------------------------------------------------------------------------------------------------------------------------------------------------------------------------------------------------------------------------------------------------------------------------------------------------------------------------------------------------------------------------------------------------------------------------------------------------------------------------------------------------------------------------------------|
| Question                                                                                                                                                                                                                                                                                                                                                                                                                                                                                                                                                                                                                                                                                                                                                                                                                                                                                                                                                                                                                                                                                                                                                                                                                                                                                                                                                                                                                                                                                                                                                                                                                                                                                                                                             | Response                                                                                                                                                                                                                                                                                                                                                                                                                                                                                                                                                                                                                                                                        |
| <p><b>Financial Disclosure</b></p> <p>Enter a financial disclosure statement that describes the sources of funding for the work included in this submission. Review the <a href="#">submission guidelines</a> for detailed requirements. View published research articles from <a href="#">PLOS ONE</a> for specific examples.</p> <p>This statement is required for submission and <b>will appear in the published article</b> if the submission is accepted. Please make sure it is accurate.</p> <p><b>Unfunded studies</b><br/>Enter: <i>The author(s) received no specific funding for this work.</i></p> <p><b>Funded studies</b><br/>Enter a statement with the following details:</p> <ul style="list-style-type: none"> <li>• Initials of the authors who received each award</li> <li>• Grant numbers awarded to each author</li> <li>• The full name of each funder</li> <li>• URL of each funder website</li> <li>• Did the sponsors or funders play any role in the study design, data collection and analysis, decision to publish, or preparation of the manuscript?</li> <li>• <b>NO</b> - Include this sentence at the end of your statement: <i>The funders had no role in study design, data collection and analysis, decision to publish, or preparation of the manuscript.</i></li> <li>• <b>YES</b> - Specify the role(s) played.</li> </ul> <p>* typeset</p> <p><b>Competing Interests</b></p> <p>Use the instructions below to enter a competing interest statement for this submission. On behalf of all authors, disclose any <a href="#">competing interests</a> that could be perceived to bias this work—acknowledging all financial support and any other relevant financial or non-financial competing interests.</p> | <p>This research was supported by funding from Fundação de Amparo à Pesquisa do Pará/Universidade do Estado do Pará (FAPESPA/UEPA) [Cooperation grant N°004/2019], Programa Institucional de Bolsas de Iniciação Científica/Instituto Evandro Chagas - Conselho Nacional de Desenvolvimento Científico e Tecnológico (PIBIC/IEC-CNPq) and Instituto Evandro Chagas/Ministério da Saúde/Secretaria de Vigilância em Saúde (IEC/MS/SVS). The funders had no role in study design, data collection and analysis, decision to publish, or preparation of the manuscript.</p> <p>The authors declare no potential conflict of interests regarding the publication of this study.</p> |

This statement **will appear in the published article** if the submission is accepted. Please make sure it is accurate. View published research articles from [PLOS ONE](#) for specific examples.

**NO authors have competing interests**

Enter: *The authors have declared that no competing interests exist.*

**Authors with competing interests**

Enter competing interest details beginning with this statement:

*I have read the journal's policy and the authors of this manuscript have the following competing interests: [insert competing interests here]*

\* typeset

**Ethics Statement**

Enter an ethics statement for this submission. This statement is required if the study involved:

- Human participants
- Human specimens or tissue
- Vertebrate animals or cephalopods
- Vertebrate embryos or tissues
- Field research

Write "N/A" if the submission does not require an ethics statement.

General guidance is provided below. Consult the [submission guidelines](#) for detailed instructions. **Make sure that all information entered here is included in the Methods section of the manuscript.**

No samples were collected for this study. Only stored samples were included without any contact and possibility of identifying the respective patients. Prior sampling and the present study were conducted in accordance with Helsinki Declaration and the Brazilian National Health Council and with approval of the ethics committee at Fundação Santa Casa de Misericórdia do Pará (referral hospital under study) (Nº CAAE 0086.0.440.000-10).

**Format for specific study types**

**Human Subject Research (involving human participants and/or tissue)**

- Give the name of the institutional review board or ethics committee that approved the study
- Include the approval number and/or a statement indicating approval of this research
- Indicate the form of consent obtained (written/oral) or the reason that consent was not obtained (e.g. the data were analyzed anonymously)

**Animal Research (involving vertebrate animals, embryos or tissues)**

- Provide the name of the Institutional Animal Care and Use Committee (IACUC) or other relevant ethics board that reviewed the study protocol, and indicate whether they approved this research or granted a formal waiver of ethical approval
- Include an approval number if one was obtained
- If the study involved *non-human primates*, add *additional details* about animal welfare and steps taken to ameliorate suffering
- If anesthesia, euthanasia, or any kind of animal sacrifice is part of the study, include briefly which substances and/or methods were applied

**Field Research**

Include the following details if this study involves the collection of plant, animal, or other materials from a natural setting:

- Field permit number
- Name of the institution or relevant body that granted permission

**Data Availability**

Authors are required to make all data underlying the findings described fully available, without restriction, and from the time of publication. PLOS allows rare exceptions to address legal and ethical concerns. See the [PLOS Data Policy](#) and [FAQ](#) for detailed information.

Yes - all data are fully available without restriction

A Data Availability Statement describing where the data can be found is required at submission. Your answers to this question constitute the Data Availability Statement and **will be published in the article**, if accepted.

**Important:** Stating 'data available on request from the author' is not sufficient. If your data are only available upon request, select 'No' for the first question and explain your exceptional situation in the text box.

Do the authors confirm that all data underlying the findings described in their manuscript are fully available without restriction?

**Describe where the data may be found in full sentences. If you are copying our sample text, replace any instances of XXX with the appropriate details.**

- If the data are **held or will be held in a public repository**, include URLs, accession numbers or DOIs. If this information will only be available after acceptance, indicate this by ticking the box below. For example: *All XXX files are available from the XXX database (accession number(s) XXX, XXX).*
- If the data are all contained **within the manuscript and/or Supporting Information files**, enter the following: *All relevant data are within the manuscript and its Supporting Information files.*
- If neither of these applies but you are able to provide **details of access elsewhere**, with or without limitations, please do so. For example:

*Data cannot be shared publicly because of [XXX]. Data are available from the XXX Institutional Data Access / Ethics Committee (contact via XXX) for researchers who meet the criteria for access to confidential data.*

*The data underlying the results presented in the study are available from (include the name of the third party*

All relevant data are within the manuscript and its Supporting Information files.

*and contact information or URL).*

- This text is appropriate if the data are owned by a third party and authors do not have permission to share the data.

\* typeset

Additional data availability information:

1 **High prevalence of atypical virulotype and genetically**  
2 **diverse background among *Pseudomonas aeruginosa***  
3 **isolates from a referral hospital in the Brazilian Amazon**

4 Yan Corrêa Rodrigues<sup>1\*</sup>, Ismari Perini Furlaneto<sup>2</sup>, Arthur Henrique Pinto Marciel<sup>3</sup>, Ana  
5 Judith Pires Garcia Quaresma<sup>3</sup>, Eliseth Costa Oliveira de Matos<sup>4</sup>, Marília Lima  
6 Conceição<sup>1</sup>, Marcelo Cleyton da Silva Vieira<sup>3</sup>, Giulia Leão da Cunha Brabo<sup>3</sup>, Edilene do  
7 Socorro Nascimento Falcão Sarges<sup>1</sup>, Luana Nepomuceno Godim Costa Lima<sup>1,3</sup>, Karla  
8 Valeria Batista Lima<sup>1,3\*</sup>.

9 <sup>1</sup>Programa de Pós-graduação em Biologia Parasitária na Amazônia, Centro de Ciências  
10 Biológicas e da Saúde, Universidade do Estado do Pará (UEPA), Belém, Pará, Brazil.

11 <sup>2</sup>Programa de Pós-graduação em Educação em Saúde, Centro Universitário do Pará  
12 (CESUPA), Belém, Pará Brazil.

13 <sup>3</sup>Laboratorio de Biologia Molecular, Seção de Bacteriologia e Micologia, Instituto  
14 Evandro Chagas (IEC), Ministério da Saúde, Ananindeua, Pará, Brazil.

15 <sup>4</sup>Departamento de Patologia, Centro de Ciências Biológicas e da Saúde, Universidade do  
16 Estado do Pará (UEPA), Belém, Pará, Brazil.

17

18

19

20

21

22

23

24

25

26

27 \*Corresponding authors:

28 E-mail: yan.13@hotmail.com (YCR)

29 E-mail: karlalima@iec.gov.br (KVBL)

## 30 Abstract

31 *Pseudomonas aeruginosa* is an opportunistic pathogen causing different types of  
32 infections, particularly in intensive care unit patients. Characteristics that favor its  
33 persistence artificial environments are related to its high adaptability, wide arsenal of  
34 virulence factors and resistance to several antimicrobials classes. Among the several  
35 virulence determinants, T3SS stands as the most important due to the clinical impact of  
36 *exoS* and *exoU* genes in patient's outcome. The molecular characterization of *P.*  
37 *aeruginosa* isolates helps in the comprehension of transmission dynamics and enhance  
38 knowledge of virulence and resistance roles in infection process. In the present study, we  
39 investigated virulence and resistance properties and the genetic background of *P.*  
40 *aeruginosa* isolated from ICUs patients at a referral hospital in Brazilian Amazon. A total  
41 of 54 *P. aeruginosa* isolates were characterized by detecting 19 virulence-related genes,  
42 antimicrobial susceptibility testing, molecular detection of  $\beta$ -lactamase-encoding genes  
43 and genotyping by MLST and rep-PCR. Our findings showed high prevalence of  
44 virulence-related markers, where 53.7% of the isolates presented at least 17 genes among  
45 the 19 investigated ( $P=0.01$ ). The rare *exoS*<sup>+</sup>/*exoU*<sup>+</sup> cytotoxic virulotype was detected in  
46 55.6% of isolates. Antimicrobial susceptibility testing revealed percentages of antibiotic  
47 resistance above 50% to carbapenems, cephalosporins and fluoroquinolones associated  
48 to MDR/XDR isolates. Isolates harboring both *bla*<sub>SPM-1</sub> and *bla*<sub>OXA</sub> genes were also  
49 detected. Genotyping methods demonstrated a wide genetic diversity of strains spread  
50 among the different intensive care units, circulation of international MDR/XDR high-risk  
51 clones (ST111, ST235, ST244 and ST277) and emergence of seven novel MLST lineages.  
52 Finally, our findings highlight the spread of strains with high virulence potential and  
53 resistance to antimicrobials and may be useful on comprehension of pathogenicity



54 process, treatment guidance and establishment of strategies to control the spread of  
55 epidemic *P. aeruginosa* strains.

## 56 **Introduction**

57 *Pseudomonas aeruginosa* is an opportunistic pathogen, causing a wide spectrum of  
58 infections, including acute and chronic respiratory tract infections (RTIs) and  
59 bloodstream infections (BSIs) as the main infection sites [1–4]. It is estimated that *P.*  
60 *aeruginosa* is responsible to about 10% of all hospital-acquired-infections worldwide and  
61 associated to outbreaks in adult, pediatric and neonatal intensive care units (ICUs) due to  
62 the spread of multi-drug resistant (MDR) or extensively drug-resistant (XDR) and highly  
63 virulent *P. aeruginosa* strains, negatively impacting morbidity, mortality, length of stay  
64 and treatment costs of patients [5–7]. *P. aeruginosa* high adaptability, resistance to  
65 several antimicrobials classes and secretion of various virulence factors allows its  
66 persistence in artificial settings of high selective pressure, such as hospitals [8–10].

67 Pathogenicity in *P. aeruginosa* is multifactorial, relying on the regulation of virulence-  
68 related genes and expression of their respective factors, including adhesins, exotoxins,  
69 proteases and pigments. Virulence products may be passively secreted from bacterial cell  
70 or actively secreted via secretion systems, such as type I secretion system (T1SS), type II  
71 secretion system (T2SS) and type III secretion system (T3SS) [11–13]. T3SS is the most  
72 important and well characterized virulence determinant in *P. aeruginosa*, which allows  
73 the translocation of effector cytotoxic proteins into the host cell via a nano-syringe. So  
74 far, only four effector exotoxins encoded by the *exoS*, *exoU*, *exoT* and *exoY* genes have  
75 been identified, which are variably present and expressed by *P. aeruginosa* strains. ExoS  
76 and ExoU are associated to invasive and cytotoxic phenotypes, respectively, and rarely

77 concomitant detected, while ExoT and ExoY demonstrate few cytotoxic effects and are  
78 encoded by most of strains [8, 14, 15, 16, 17]. Furthermore, survey of cytotoxic/*exoU*<sup>+</sup>  
79 virulotype has been highly recommended due to the impact of this exotoxin in patient's  
80 mortality, especially in isolates from high risk settings, such as ICUs [19, 18].

81 The increasing trend of resistance to anti-pseudomonal antibiotics, especially  
82 carbapenems, aminoglycosides and fluoroquinolones has contributed to the emergence of  
83 *P. aeruginosa* MDR/XDR strains, posing a challenge to infection treatment [20–22].  
84 Among the several resistance mechanisms in *P. aeruginosa*, the role of transferable  
85 resistance determinants is overwhelming, particularly those encoding classes A and D  
86 extended-spectrum  $\beta$ -lactamases (ESBLs) and class B metallo- $\beta$ -lactamases (MBLs) [23–  
87 26].

88 Molecular typing of in-hospital isolates of *P. aeruginosa* contribute to the understanding  
89 of transmission and infection dynamics by strains exhibiting high degree of virulence and  
90 resistance, allowing the determination of genetic relationships between isolates,  
91 outbreaks identification, population structure studies and therapeutic management [27–  
92 29]. In spite of the polyclonal population structure of *P. aeruginosa*, several studies have  
93 shown a globally spread of strains denominated as high-risk clones (HRC), which are  
94 associated with most MDR/XDR isolates and specific virulence markers. Thus,  
95 characterization of *P. aeruginosa* isolates must be performed combining clonality  
96 evaluation with methods that can identify specific virulence and resistance determinants  
97 [19, 23, 31, 32].

98 The molecular characterization of local *P. aeruginosa* isolates is one of the first steps to  
99 understand the epidemiology of the pathogen at local and global level, helping to establish

100 surveillance strategies, reduce risk of outbreaks and enhance knowledge of virulence and  
101 resistance roles in infection process. Nonetheless, comprehensive epidemiological  
102 investigations on molecular level are still scarce, especially ones reporting data from  
103 Brazilian territory. In the present study we report in-depth data into the virulence,  
104 resistance properties and genetic diversity of in-patient ICU isolates from a referral  
105 hospital in the Brazilian Amazon region.

## 106 **Material and Methods**

### 107 **Bacterial isolates**

108 In this retrospective cross-sectional study, a total of 54 non-repetitive *P. aeruginosa*  
109 isolates stored in the Bacteriology and Mycology Section of the Evandro Chagas Institute  
110 were evaluated. Isolates were previously recovered of various clinical sources of patients  
111 hospitalized in different ICUs at a referral hospital, from January 2010 to June 2013 (S1  
112 Table). Identification of isolates was performed on automated VITEK-2 system  
113 (bioMérieux, Marcy l'Etoile, France) and complemented by phenotypical and  
114 biochemical assays such as observation of colony morphology, Gram stain, oxidase test,  
115 absence of carbohydrate fermentation on triple sugar iron agar, oxidative behavior on  
116 Hugh Leifson medium and the cytochrome oxidase reaction.

### 117 **DNA extraction and molecular detection of virulence-related** 118 **genes**

119 Genomic DNA was obtained from a single colony of overnight cultures for each *P.*  
120 *aeruginosa* isolate using UltraClean™ Microbial DNA Isolation kit (MoBio

121 Laboratories, Carlsbad, CA, USA), following manufacturer's recommendations and  
122 quantified using the Picodrop PICO100 spectrophotometer (Picodrop Limited, Hinxton,  
123 UK). Adjusted DNA concentrations between 25ng – 50ng/ $\mu$ l were used for all subsequent  
124 molecular assays.

125 The detection of 19 virulence-related markers was performed by PCR: adhesion (*algU*  
126 and *algD*), T1SS (*aprA*), T2SS (*lasA*, *lasB* and *toxA*), T3SS (*exoS*, *exoU*, *exoT* and *exoY*),  
127 oxidative stress (*phzI*, *phzII*, *phzM*, *phzS* and *phzH*) and quorum sensing (QS)/regulation  
128 (*lasI*, *lasR*, *rhlL* and *rhlR*), using previously described primers and reaction parameters  
129 with slightly modifications [33–38]. Each PCR mixture was prepared in a final volume  
130 of 25 $\mu$ l, consisted of 1x PCR buffer (Qiagen, Hilden, Germany), 1x Q-solution (Qiagen,  
131 Hilden, Germany), 2mM of MgCl<sub>2</sub> (Qiagen, Hilden, Germany), 200  $\mu$ M of each dNTP  
132 (Invitrogen™, São Paulo, Brazil), 0,5 $\mu$ M of each primer, 1U of HotStart Taq DNA  
133 polymerase and DNA template. Amplifications were performed on Veriti thermocycler  
134 (Applied Biosystems, Foster City, CA, USA), under the following conditions for all  
135 genes: 95°C for 15 minutes; followed by 35 cycles at 95°C for 1 minute, 60°C for 45  
136 seconds, 72°C for 1 minute and a final extension step at 72°C for 7 minutes. PCR products  
137 were subjected to electrophoresis on 1.5% agarose gel and amplicons visualized under  
138 ultraviolet light. *P. aeruginosa* ATCC 27853 and PA14 strains were used as positive  
139 control.

## 140 **Antimicrobial susceptibility assays and definition of resistance**

### 141 **phenotypes**

142 Antimicrobial susceptibility testing determined the Minimum Inhibitory Concentration  
143 (MICs) by the broth microdilution method for six antimicrobial classes: cephalosporins

144 (cefepime – FEP), carbapenems (imipenem – IMP and meropenem – MER), penicilins +  
145 beta-lactamase inhibitor (piperacillin+tazobactam – TZP), aminoglycosides (gentamicin  
146 – GN), fluoroquinolones (ciprofloxacin – CIP) and polypeptides (polymyxin B – POL).  
147 All assays were performed in accordance to the Clinical and Laboratory Standards  
148 Institute guidelines and breakpoints [39] and isolates were classified as sensitive (S),  
149 intermediate (I) and resistant (R). Reference strains *Escherichia coli* ATCC 25922 and *P.*  
150 *aeruginosa* ATCC 27853 were used as quality control. For statistical analysis, isolates  
151 exhibiting resistant and intermediate susceptibility phenotypes were grouped as ‘non-  
152 susceptible’. Isolates were phenotypically classified as MultiS if susceptible to all tested  
153 antimicrobial classes; Moderately resistant (ModR) if resistant to  $\geq 1$  drug in  $< 3$   
154 antimicrobial classes; MDR if resistant to  $\geq 1$  drug in  $\geq 3$  antimicrobial classes and XDR  
155 if non-susceptible to 1 agent in all but  $\leq 2$  tested categories, according to previously  
156 described criteria [31, 40].

## 157 **Molecular detection of antimicrobial resistance markers**

158 The detection of  $\beta$ -lactamase-encoding genes, including ESBLs (*bla*<sub>CTX-M1</sub>, *bla*<sub>OXA-2</sub>,  
159 *bla*<sub>OXA-10</sub>) and carbapenemases (*bla*<sub>IMP-1</sub>, *bla*<sub>IMP-2</sub>, *bla*<sub>VIM-1</sub>, *bla*<sub>VIM-2</sub>, *bla*<sub>SPM-1</sub>, *bla*<sub>NDM-1</sub> and  
160 *bla*<sub>KPC-1</sub>) was performed by PCR on Veriti thermocycler (Applied Biosystem, Foster City,  
161 CA, USA) as previously described [41–47]. PCR products were subjected to  
162 electrophoresis on 1.5% agarose gel and amplicons visualized under ultraviolet light.

## 163 **Molecular typing based on MLST**

164 MLST genotyping was performed according to protocol described by Curran et al. (2004)  
165 [48]. The seven housekeeping genes (*acsA*, *aroE*, *guaA*, *mutL*, *nuoD*, *ppsA*, and *trpE*)  
166 were amplified by PCR in a Veriti thermocycler (Applied Biosystems, Foster City, CA,

167 USA). Reaction products were bidirectionally sequenced using Big Dye Terminator v3.1  
168 chemistry on ABI Prism 3100 Genetic Analyzer (Applied Biosystems, Foster City, CA,  
169 USA). Obtained results were compared to available data at PubMLST database  
170 (<http://pubmlst.org/paeruginosa>) to determine allelic profiles and sequence types (STs).  
171 Novel alleles and STs were submitted to PubMLST database for validation. PHYLOViZ  
172 2.0 platform was used for data management and analysis of clonal complexes (CCs),  
173 which were defined by related ST clusters exhibiting variation in a single locus (single  
174 locus variants - SLV) or in two loci (double locus variants - DLV) [49].

## 175 **Molecular typing based on rep-PCR**

176 The genetic relatedness of isolates was investigated by semi-automated rep-PCR on  
177 DiversiLab™ Strain Typing System (bioMérieux, Marcy-L'Étoile, France) using the  
178 DiversiLab *P. aeruginosa* kit (Bacterial Barcodes, bioMérieux, Marcy-L'Étoile, France),  
179 according to the manufacturer's instructions. Fingerprints were obtained by  
180 electrophoresis using microfluidic lab-on-a-chip on Agilent 2100 Bioanalyzer equipment  
181 (Agilent Technologies, Palo Alto, CA, USA) and analysis performed with DiversiLab on-  
182 line software (v 3.4) applying the Pearson correlation coefficient. Isolates were classified  
183 as in the same clonal group (genotypically indistinguishable) if the similarity was  $\geq 97\%$ ,  
184 and as unique pattern if the similarity was  $< 97\%$ .

## 185 **Statistical analysis**

186 The G-test of independence or Fisher's exact test was applied to verify the association  
187 between resistance, virulence markers, isolation sites, clonal groups and STs;  
188 standardized residuals and adjusted residuals was used as a post-hoc test after a  
189 statistically significant G-test of independence. The distribution of virulence-related

190 genes among isolates was verified by the Lilliefors test. Values of  $P \leq 0.05$  were  
191 considered statistically significant. All analyzes were performed using the statistical  
192 software BioEstat® 5.4 [50].

## 193 **Ethics statement**

194 No samples were collected for this study. Only stored samples were included without any  
195 contact and possibility of identifying the respective patients. Prior sampling and the  
196 present study were conducted in accordance with Helsinki Declaration and the Brazilian  
197 National Health Council [51] and with approval of the ethics committee at Fundação  
198 Santa Casa de Misericórdia do Pará (referral hospital under study) (Nº CAAE  
199 0086.0.440.000-10).

## 200 **Results**

### 201 **Bacterial isolates and distribution of virulence-related genes**

202 This study evaluated 54 *P. aeruginosa* isolates distributed in the adult ICU (AICU, 28/54  
203 –51.8%), followed by pediatric ICU (PICU, 14/54 – 26.0%) and neonatal ICU (NICU,  
204 12/54 – 22.2%). Regarding clinical origin, isolates were obtained from RTI (23/54 –  
205 42.6%), BSI (14/54 – 25.9%) and others various sources (17/54 –31.5%), including  
206 catheter (n= 6), rectal swab (n=3), surgical wound (n=3), ocular secretion (n=2), gastric  
207 secretion (n=1), urethral secretion (n=1), urine (n=1) (S1 Table).

208 Evaluated isolates harbored at least five virulence-related genes and seven isolates  
209 harbored all 19 investigated genes. In addition, a heterogeneous distribution of genes was  
210 observed, where 53.7% of the isolates presented at least 17 genes among the 19  
211 investigated ( $P =0.01$ ). The lowest detection frequencies were observed for *lasA* (21/54

212 – 38.9%) and *algU* (25/54 – 46.3%) genes, while *lasB*, *exoS*, *rhlL* and *rhlR* genes were  
213 detected in all isolates (54/54 – 100%) (S1 Fig and S1 Table). Definition of virulotypes  
214 was based on the detection of T3SS *exoS/exoU* genes, where it was observed the presence  
215 of invasive/cytotoxic (*exoS*<sup>+</sup>/*exoU*<sup>+</sup>; 30/54 – 55.6%) and invasive (*exoS*<sup>+</sup>/*exoU*<sup>-</sup>; 24/54 –  
216 44.4%) virulotypes. *exoS*<sup>+</sup>/*exoU*<sup>+</sup> virulotype and *phzH* gene were detected with  
217 significantly lower frequency at NICU ( $P = 0.0461$  and  $p = 0.0491$ , respectively), and  
218 among isolates from BSI ( $P = 0.0027$  and  $P = 0.0244$ , respectively), as well as *exoY* gene  
219 ( $P = 0.0435$ ) (Tables 1 and 2).

220

221

222

223

224

225

226

227

228

229

230

231

232

233

234

235



236 **Table 1. Distribution of virulence-related genes according to patient's ICUs.**

| Related function | Gene                                                | AICU<br><i>n</i> = 28 | PICU<br><i>n</i> = 14 | NICU<br><i>n</i> = 12 | <i>P</i> -value* |
|------------------|-----------------------------------------------------|-----------------------|-----------------------|-----------------------|------------------|
| Adhesion         | <i>algU</i>                                         | 12                    | 7                     | 6                     | 0.8758           |
|                  | <i>algD</i>                                         | 28                    | 13                    | 12                    | 0.4601           |
| T1SS             | <i>aprA</i>                                         | 21                    | 10                    | 6                     | 0.3204           |
|                  | <i>lasA</i>                                         | 9                     | 7                     | 5                     | 0.5379           |
| T2SS             | <i>lasB</i>                                         | 28                    | 14                    | 12                    | 1.000            |
|                  | <i>toxA</i>                                         | 23                    | 13                    | 11                    | 0.9329           |
| T3SS             | <i>exoS</i> <sup>+</sup> / <i>exoU</i> <sup>+</sup> | 17                    | 10                    | 3 <sup>a</sup>        | 0.0461*          |
|                  | <i>exoS</i> <sup>+</sup> / <i>exoU</i> <sup>-</sup> | 11                    | 4                     | 9                     |                  |
|                  | <i>exoT</i>                                         | 21                    | 12                    | 6                     | 0.1371           |
|                  | <i>exoY</i>                                         | 23                    | 12                    | 6                     | 0.0863           |
|                  | <i>phzI</i>                                         | 27                    | 13                    | 11                    | 0.8346           |
| Oxidative stress | <i>phzII</i>                                        | 21                    | 11                    | 5                     | 0.0959           |
|                  | <i>phzM</i>                                         | 22                    | 12                    | 7                     | 0.2775           |
|                  | <i>phzS</i>                                         | 20                    | 12                    | 5                     | 0.0581           |
|                  | <i>phzH</i>                                         | 21                    | 12                    | 5 <sup>a</sup>        | 0.0491*          |
| QS/regulation    | <i>lasI</i>                                         | 26                    | 13                    | 12                    | 0.5386           |
|                  | <i>lasR</i>                                         | 26                    | 12                    | 12                    | 0.3334           |
|                  | <i>rhlL</i>                                         | 28                    | 14                    | 12                    | 1.000            |
|                  | <i>rhlR</i>                                         | 28                    | 14                    | 12                    | 1.000            |

237 T1SS, type I secretion system; T2SS, type II secretion system; T3SS, type III secretion system;  
 238 QS, *quorum sensing*; AICU, adult intensive care unit; PICU, pediatric intensive care unit; NICU,  
 239 neonatal intensive care unit.

240 \* *P* values were calculated using the G-test of independence. <sup>a</sup> Frequency lower than expected at  
 241 random.

242

243

244 **Table 2. Distribution of virulence-related genes according to the *P. aeruginosa***  
 245 **isolates clinical sources.**

| Related function | Gene                                                | RTI<br><i>n</i> = 23 | BSI<br><i>n</i> = 14 | Other<br><i>n</i> = 17 | <i>P</i> -valor* |
|------------------|-----------------------------------------------------|----------------------|----------------------|------------------------|------------------|
| Adhesion         | <i>algU</i>                                         | 12                   | 6                    | 7                      | 0.7617           |
|                  | <i>algD</i>                                         | 23                   | 14                   | 16                     | 0.5003           |
| T1SS             | <i>aprA</i>                                         | 15                   | 7                    | 15                     | 0.0618           |
|                  | <i>lasA</i>                                         | 7                    | 5                    | 9                      | 0.3569           |
| T2SS             | <i>lasB</i>                                         | 23                   | 14                   | 17                     | 1.000            |
|                  | <i>toxA</i>                                         | 21                   | 13                   | 15                     | 0.9132           |
| T3SS             | <i>exoS</i> <sup>+</sup> / <i>exoU</i> <sup>+</sup> | 13                   | 3 <sup>a</sup>       | 14                     | 0.0027*          |
|                  | <i>exoS</i> <sup>+</sup> / <i>exoU</i> <sup>-</sup> | 10                   | 11                   | 3                      |                  |
|                  | <i>exoT</i>                                         | 17                   | 7                    | 15                     | 0.0670           |
|                  | <i>exoY</i>                                         | 19                   | 7 <sup>a</sup>       | 15                     | 0.0435*          |
|                  | <i>phzI</i>                                         | 23                   | 13                   | 15                     | 0.2276           |
| Oxidative stress | <i>phzII</i>                                        | 17                   | 7                    | 13                     | 0.2489           |
|                  | <i>phzM</i>                                         | 18                   | 8                    | 15                     | 0.1449           |
|                  | <i>phzS</i>                                         | 17                   | 6                    | 14                     | 0.0596           |
|                  | <i>phzH</i>                                         | 17                   | 6 <sup>a</sup>       | 15                     | 0.0244*          |
|                  | <i>lasI</i>                                         | 21                   | 13                   | 17                     | 0.3815           |
| QS/regulation    | <i>lasR</i>                                         | 21                   | 13                   | 16                     | 0.9518           |
|                  | <i>rhlL</i>                                         | 23                   | 14                   | 17                     | 1.000            |
|                  | <i>rhlR</i>                                         | 23                   | 14                   | 17                     | 1.000            |

246 T1SS, type I secretion system; T2SS, type II secretion system; T3SS, type III secretion system;  
 247 RTI, respiratory tract infection; BSI, bloodstream infection; Other: catheter (n= 6), rectal swab  
 248 (n=3), surgical wound (n=3), ocular secretion (n=2), gastric secretion (n=1), urethral secretion  
 249 (n=1), urine (n=1).

250 \* *P* values were calculated using the G-test of independence. <sup>a</sup> Frequency lower than expected at  
 251 random.

252

253

## 254 Antimicrobial susceptibility features

255 Antimicrobial susceptibility testing revealed that isolates were mainly non-susceptible to  
 256 carbapenems (IMP and MER; 36/54 – 66.7%), followed by FEP (27/54 – 50.0%),  
 257 (27/54 – 50.0%), GN (24/54 – 44.4%) and TZP (17/54 – 31.5%). All isolates were  
 258 susceptible to POL (S1 Table). According to phenotypical classification, most of the  
 259 isolates were classified as ModR (23/54 – 42.6%), followed by XDR (16/54 – 29.6%),  
 260 MultiS (9/54 – 16.7%) and MDR (6/54 – 11.1%). MDR/XDR were significantly  
 261 predominant in the AICU (Table 3) ( $P = 0.0003$ ). There was no significant association  
 262 between the presence of T3SS virulotypes and antimicrobial resistance (Table 4), where  
 263 33.3% (18/30) *exoU*<sup>+</sup> were classified as MultiS or ModR.

264 **Table 3. Distribution of *P. aeruginosa* isolates according to susceptibility phenotype**  
 265 **among the ICUs of in reference hospital.**

|      | MultiS/ModR | MDR/XDR | <i>P</i> -value* |
|------|-------------|---------|------------------|
| ICU  |             |         |                  |
| AICU | 11          | 17      | 0.0003           |
| PICU | 9           | 5       |                  |
| NICU | 12          | 0       |                  |

266 ICU, intensive care unit; AICU, adult intensive care unit; PICU, pediatric intensive care unit;  
 267 NICU, neonatal intensive care unit; MultiS, susceptible to all tested antibiotics; ModR,  
 268 moderately resistant; MDR, multi-drug resistant; XDR, extensively drug-resistant.

269 \* *P* value was calculated using the G-test of independence.

270

271

272

273 **Table 4. Distribution of T3SS virulotypes according to antimicrobial susceptibility**  
 274 **of *P. aeruginosa* isolates.**

|                                 | <i>exoS</i> <sup>+</sup> / <i>exoU</i> <sup>+</sup><br><i>n</i> = 30 | <i>exoS</i> <sup>+</sup> / <i>exoU</i> <sup>-</sup><br><i>n</i> = 24 | <i>P</i> -value* |
|---------------------------------|----------------------------------------------------------------------|----------------------------------------------------------------------|------------------|
| <b>Antimicrobial resistance</b> |                                                                      |                                                                      |                  |
| FEP                             | 15                                                                   | 12                                                                   | 1.000            |
| IMP                             | 21                                                                   | 15                                                                   | 0.5770           |
| MER                             | 15                                                                   | 11                                                                   | 0.7905           |
| TZP                             | 9                                                                    | 8                                                                    | 1.000            |
| GN                              | 13                                                                   | 11                                                                   | 1.000            |
| CIP                             | 14                                                                   | 13                                                                   | 0.7846           |
| <b>Susceptibility phenotype</b> |                                                                      |                                                                      |                  |
| MultiS                          | 3                                                                    | 6                                                                    | 0.2702           |
| ModR                            | 15                                                                   | 8                                                                    | 0.2738           |
| MDR                             | 5                                                                    | 1                                                                    | 0.2100           |
| XDR                             | 7                                                                    | 9                                                                    | 0.3695           |
| MDR+XDR                         | 12                                                                   | 10                                                                   | 1.000            |

275 FEP, cefepime; IMP, imipenem; MER, meropenem; TZP, piperacillin+tazobactam; GN,  
 276 gentamicin; CIP, ciprofloxacin; POL, polymyxin B; MultiS, susceptible to all tested antibiotics;  
 277 ModR, moderately resistant; MDR, multi-drug resistant; XDR, extensively drug-resistant.  
 278 \* *P* values were calculated using the Fisher's exact test.

279 Regarding molecular survey of antimicrobial resistance genes, 20.4% (11/54) of *P.*  
 280 *aeruginosa* isolates harbored *bla*<sub>CTX-M1</sub>, followed by *bla*<sub>SPM-1</sub> (5/54 – 9.2%), *bla*<sub>OXA-2</sub> (3/54  
 281 – 5.5%) and *bla*<sub>OXA-10</sub> (3/54 – 5.5%). Two isolates harbored both *bla*<sub>SPM-1</sub> and *bla*<sub>OXA-2</sub> and  
 282 *bla*<sub>SPM-1</sub> and *bla*<sub>OXA-10</sub> genes. One isolate harbored *bla*<sub>OXA-2</sub> gene and one isolate harbored  
 283 *bla*<sub>OXA-10</sub>. Four isolates harboring *bla*<sub>SPM-1</sub> genes and seven isolates harboring *bla*<sub>CTX-M1</sub>  
 284 were classified as XDR. The *bla*<sub>IMP</sub>, *bla*<sub>VIM</sub>, *bla*<sub>NDM</sub> and *bla*<sub>KPC</sub> genes were not detected.

285

286

## 287 **Molecular typing based on MLST**

288 MLST genotyping revealed a highly diverse genetic background with the presence of 22  
289 different STs, including seven novel STs (ST2524, ST2541, ST2552, ST2554, ST2555,  
290 ST 2556 and ST2603) and 15 STs previously reported (ST111, ST170, ST235, ST244,  
291 ST277, ST360, ST463, ST500, ST508, ST1076, ST1197, ST1284, ST1655, ST2100 and  
292 ST2437). Novel allele 218/*aroE* was associated to ST2603. Genetic relationship analysis  
293 demonstrated the presence founders STs of four HRC CC, including CC/ST111 (2/22 –  
294 9.0%), CC/ST235 (5/22 – 22.7%), CC/ST244 (9/22 – 40.9%) and CC/ST277 (6/22 –  
295 27.2%). Among the seven novel STs, ST 2554 emerged as DLV of CC/ST274, which is  
296 a HRC; ST 2555 as SLV of ST 316 and the other five STs (ST2524, ST2541, ST2552,  
297 ST 2556 and ST2603) were singletons.

298 Among the isolates, 40.7% (22/54) were associated to HRC and 59.3% (32/54) to non-  
299 HRC. HRC were significantly predominant in the AICU ( $P=0.0100$ ) (Table 5), especially  
300 ST244 (8/28 – 28.5%). Although no significant association between MLST genotypes  
301 and T3SS virulotypes was observed, 50% (11/22) of HRC presented *exoS*<sup>+</sup>/*exoU*<sup>+</sup>  
302 virulotype ( $P=0.5820$ ) (Table 5). Non-susceptibility to FEP, IMP, MER, GN, CIP ( $P <$   
303  $0.001$ ) and TZP ( $P=0.0198$ ) was predominant among HRC strains (Table 5). All 16 XDR  
304 isolates were associated to the detected HRC ( $P <0.0001$ ) (Table 5) and only one MDR  
305 isolate belonged to non-HCR (ST2524); whereas all ModR isolates were associated to  
306 non-HRC ( $P <0.0001$ ) (Table 5) and only one MultiS isolate belonged to HCR (ST244)  
307 (Fig 1). Five isolates harboring *bla*<sub>SPM-1</sub>, *bla*<sub>OXA-2</sub> and *bla*<sub>OXA-10</sub> genes belonged to HRC  
308 ST277 and one isolate harboring only *bla*<sub>OXA-2</sub> was associated to non-HRC ST508;

309 while isolates harboring *bla*<sub>CTX-M1</sub> belonged to HRC ST111, ST244, ST253 (10/11) and  
310 to non-HRC ST1284 (1/11).

311 **Fig 1. Minimum spanning tree of the 54 *P. aeruginosa* isolates from the referral**  
312 **hospital in the Brazilian Amazon genotyped by MLST.**

313 Each circle represents a different ST and the size of the circle is proportional to the number of  
314 isolates related to the respective ST. Each of the 4 susceptibility phenotypes is represented by a  
315 different color. Dotted lines represent multilocus variants. The graph shows the percentages of  
316 HRC associated with a particular susceptibility phenotype.

317

318

319

320

321

322

323

324

325

326

327

328

329 **Table 5. Distribution of HRC and non-HRC according to ICUs, T3SS virulotypes**  
 330 **and antimicrobial susceptibility of *P. aeruginosa* isolates.**

|                                 | <b>HRC</b><br><i>n</i> = 22 | <b>non-HRC</b><br><i>n</i> = 32 | <b><i>P</i>-value*</b> |
|---------------------------------|-----------------------------|---------------------------------|------------------------|
| <b>ICU</b>                      |                             |                                 |                        |
| AICU                            | 16 <sup>a</sup>             | 12 <sup>b</sup>                 |                        |
| PICU                            | 5                           | 9                               | 0.0100                 |
| NICU                            | 1 <sup>b</sup>              | 11 <sup>a</sup>                 |                        |
| <b>T3SS Virulotype</b>          |                             |                                 |                        |
| <i>exoS</i> +/ <i>exoU</i> +    | 11                          | 19                              |                        |
| <i>exoS</i> +/ <i>exoU</i> -    | 11                          | 13                              | 0.5820                 |
| <b>Antimicrobial resistance</b> |                             |                                 |                        |
| FEP                             | 18                          | 9                               | 0.0002                 |
| IMP                             | 20                          | 16                              | 0.0027                 |
| MER                             | 17                          | 9                               | 0.0007                 |
| TZP                             | 11                          | 6                               | 0.0198                 |
| GN                              | 20                          | 4                               | < 0.0001               |
| CIP                             | 21                          | 6                               | < 0.0001               |
| <b>Susceptibility phenotype</b> |                             |                                 |                        |
| MultiS                          | 1                           | 8                               | 0.0676                 |
| ModR                            | 0                           | 23                              | < 0.0001               |
| MultiS+ModR                     | 1                           | 31                              | < 0.0001               |
| MDR                             | 5                           | 1                               | 0.0706                 |
| XDR                             | 16                          | 0                               | < 0.0001               |
| MDR+XDR                         | 21                          | 1                               | < 0.0001               |

331 HRC, high-risk clones; ICU, intensive care unit; AICU, adult intensive care unit; PICU, pediatric  
 332 intensive care unit; NICU, neonatal intensive care unit; T3SS, type III secretion system; FEP,  
 333 cefepime; IMP, imipenem; MER, meropenem; TZP, piperacillin+tazobactam; GN, gentamicin;  
 334 CIP, ciprofloxacin; POL, polymyxin B; MultiS, susceptible to all tested antibiotics; ModR,  
 335 moderately resistant; MDR, multi-drug resistant; XDR, extensively drug-resistant.

336 \* *P* values were calculated using the G-test of independence or Fisher's exact test.

337 <sup>a</sup>Frequency higher than expected at random. <sup>b</sup>Frequency lower than expected at random.

338

## 339 **Molecular typing based on rep-PCR**

340 Genotyping by rep-PCR on DiversiLab™ System revealed 36 distinct fingerprint  
341 patterns, of which 26 were unique patterns and ten clonal groups comprised of two to  
342 eight isolates (Fig 2). Strains associated to clonal groups were found circulating in  
343 different ICUs, however, no statistically significant association was observed between  
344 clonality and ICUs ( $P = 0.5063$ ) (Table 6). The frequency of virulotypes was similar  
345 between the different clonal patterns defined by DiversiLab™ ( $P = 1.000$ ) (Table 6).  
346 MDR/XDR isolates were found in higher proportion among clonal groups strains ( $P$   
347  $= 0.0141$ ) (Table 6). Isolates harboring *bla*<sub>SPM-1</sub>, *bla*<sub>OXA-2</sub> and *bla*<sub>OXA-10</sub> genes were  
348 related to clonal groups A, B and C/ST277, while *bla*<sub>CTX-M1</sub> gene was distributed among  
349 clonal groups (D, E, I and H) and unrelated strains (Fig 2). Genetic diversity observed  
350 through MLST genotyping presented a good association with fingerprint diversity found  
351 by rep-PCR, of which seven clonal groups were associated to HRC, but without reaching  
352 significant association ( $P = 0.0573$ ) (Table 6).

353 **Fig 2. Dendrogram of genetic similarity of the 54 *P. aeruginosa* isolates from the**  
354 **referral hospital in the Brazilian Amazon genotyped by rep-PCR in the**  
355 **DiversiLab™ System.**

356 \* Novel STs. ST, sequence type; ICU, intensive care unit; AICU, adult intensive care unit; PICU,  
357 pediatric intensive care unit; NICU, neonatal intensive care unit; RTI, respiratory tract infection;  
358 BSI, bloodstream infection; T3SS, type III secretion system; MultiS, susceptible to all tested  
359 antibiotics; ModR, moderately resistant; MDR, multi-drug resistant; XDR, extensively drug-  
360 resistant.

361

362



363 **Table 6. Distribution of rep-PCR patterns according ICUs, T3SS virulotypes and**  
 364 **antimicrobial susceptibility of *P. aeruginosa* isolates.**

|                                 | Clonal Group<br><i>n</i> = 28 | Unique patterns<br><i>n</i> = 26 | <i>P</i> -valor* |
|---------------------------------|-------------------------------|----------------------------------|------------------|
| <b>ICU</b>                      |                               |                                  |                  |
| AICU                            | 14                            | 14                               | 0.5063           |
| PICU                            | 9                             | 5                                |                  |
| NICU                            | 5                             | 7                                |                  |
| <b>T3SS Virulotype</b>          |                               |                                  |                  |
| <i>exoS</i> +/ <i>exoU</i> +    | 16                            | 14                               | 1.000            |
| <i>exoS</i> +/ <i>exoU</i> -    | 12                            | 12                               |                  |
| <b>Susceptibility phenotype</b> |                               |                                  |                  |
| MultiS                          | 3                             | 6                                | 0.2863           |
| ModR                            | 9                             | 14                               | 0.1683           |
| MultiS+ModR                     | 12                            | 20                               | 0.0141           |
| MDR                             | 5                             | 1                                | 0.1938           |
| XDR                             | 11                            | 5                                | 0.1410           |
| MDR+XDR                         | 16                            | 6                                | 0.0141           |
| <b>MLST</b>                     |                               |                                  |                  |
| HRC                             | 15                            | 13                               | 0.0573           |
| non-HRC                         | 7                             | 19                               |                  |

365 AICU, adult intensive care unit; PICU, pediatric intensive care unit; NICU, neonatal intensive  
 366 care unit; T3SS, type III secretion system; MultiS, susceptible to all tested antibiotics; ModR,  
 367 moderately resistant; MDR, multi-drug resistant; XDR, extensively drug-resistant; HRC, high-  
 368 risk clones.

369 \* *P* values were calculated using the G-test of independence or Fisher's exact test.

## 370 **Discussion**

371 *P. aeruginosa* is currently one of the most relevant opportunistic pathogens causing acute  
 372 infections, particularly among patients admitted to ICUs [5–6]. The occurrence of  
 373 infection episodes and mortality in ICUs is significantly higher compared to other hospital  
 374 wards; this scenario is justified by the complexity of the patients' clinical condition, such

375 as immunosuppression and pre-existing diseases, use of invasive diagnostic and  
376 therapeutic maneuvers, as well as, the spread of epidemic and highly virulent strains of  
377 *P. aeruginosa* [2, 4, 23, 32]. *P. aeruginosa* isolates included in our study were mainly  
378 recovered from RTI (42.6%) and BSI (25.9%) of patients admitted to different ICUs,  
379 similarly as previously reported infections frequencies, which varied between 9% to 35%  
380 in adult ICUs, reaching 62% in neonatal and pediatric ICUs and with RTI and BSI as  
381 major clinical sources [2, 3, 4, 6, 52, 53].

382 Although considered an opportunistic pathogen, the myriad of virulence products of *P.*  
383 *aeruginosa* may severally impact patients' clinical condition. The combination of multiple  
384 genes and virulence factors tends to affect pathogenesis and determine the outcome of an  
385 infectious process, and depending on the location and type of infection, the importance  
386 and role of a given factor may be different [10, 38, 54]. The detection of virulence-related  
387 markers revealed a high prevalence of genes, with detection of at least five genes per  
388 isolate and 17 of the 19 genes investigated in more than 50% of the isolates ( $P = 0.01$ ),  
389 demonstrating a high virulence potential of our strains (S1 Fig). Although our findings  
390 are consistent with several other reports that indicates a high prevalence and conserved  
391 nature of the *P. aeruginosa* genome regarding the presence of virulence-related genes,  
392 variations in virulence patterns are observed in isolates from different geographic areas  
393 and settings, highlighting the need to investigate different markers among distinct *P.*  
394 *aeruginosa* populations [1, 13, 23, 35, 55, 56].

395 The *algD* gene was detected in 98.1% of isolates, while absence of *algU* was noted in  
396 more than 53.0%. These findings differ from those reported by Hassuna et al (2020) [1]  
397 and Fazeli et al (2014) [57], who observed higher frequencies for *algU* and lower  
398 frequencies for *algD*, respectively. As both genes encode fundamental proteins for

399 alginate biosynthesis, functioning as one of its main adhesins and mainly found in the  
400 respiratory tract of patients with acute infections and cystic fibrosis (CF), the low  
401 frequency of the *algU* may be associated to the high frequency of non-RTI isolates  
402 (57.4%) and also indicate deficient alginate production by most of our isolates [10, 58].

403 The high prevalence of the *aprA* gene is in line with other studies [1, 13, 56, 59],  
404 highlighting the importance of zinc-metalloprotease secreted by T1SS, which has  
405 functions related to invasion, causing collagen and fibrinogen degradation in synergy with  
406 T2SS elastases, and evasion of the immune system through the inactivation of several  
407 cytokines, contributing to bacterial survival [60–61]. Three proteases - two elastases  
408 (LasA and LasB) and an exotoxin (ExoA) - secreted by *P. aeruginosa* are constituents of  
409 T2SS. The detection frequencies of 87.0% for *toxA* and 100.0% for *lasB*, in addition to  
410 the absence *lasA* among more than 60%  our strains are in agreement with several other  
411 studies [1, 13, 56, 57, 62, 63]. Elastases act synergistically and have high elastolytic  
412 capacity mainly in blood vessels and lung tissues, while ExoA inhibits host protein  
413 synthesis leading to cell death [64–65]. Thus, our results reinforce the hypothesis of a  
414 significantly higher prevalence of *lasB* over *lasA* in *P. aeruginosa* clinical isolates [37,  
415 66].

416 The phenazine compounds encoded by the *phzI*, *phzII*, *phzH*, *phzM* and *phzS* genes have  
417 siderophoric activity, cause an increase in oxidative stress and mitochondrial inactivation  
418 [10, 67]. Interestingly, Bradbury et al (2010) [13] correlated a high prevalence of these  
419 genes to *P. aeruginosa* clinical isolates, disagreeing with the low prevalence reported  
420 among our  strains, and mainly of *phzH* gene, which  absence was significant among  
421 isolates from BSI ( $P = 0.0244$ ) at NICU ( $P = 0.0491$ ) (Tables 1 and 2).

422 The QS genes were detected at frequencies above 92.0%, however, four isolates did not  
423 harbor *lasR* gene and three isolates *lasI* gene. The QS system in *P. aeruginosa* is  
424 coordinated by the *las* and *rhl* systems that function hierarchically for bacterial survival  
425 in the face of environmental changes, biofilm formation and control of several other  
426 virulence factors [10, 12]. Although a decrease in the ability to express virulence factors  
427 has been reported due to the absence and/or mutations in genes related to such QS, this  
428 does not necessarily compromise the ability to cause infection due to regulation mediated  
429 by the *rhl* system [12, 68, 69] Our results are in agreement with a study carried out by  
430 Senturk et al. (2012) [12] and Ruiz-Roldán et al. (2018) [56]; however, disagreeing with  
431 Aboushleib et al. (2015) [69], who reported gene deficiency in more than 60% in clinical  
432 isolates.

433 T3SS is the most important virulence marker in *P. aeruginosa*. The *exoS*, *exoU*, *exoT* and  
434 *exoY* genes encode toxins which are injected directly into the cytosol of the host cells and  
435 have functions related to anti-phagocytosis, necrotic and cytotoxic damage by a  
436 phospholipase, prevention of healing process and edema formation, respectively [10, 16,  
437 54]. T3SS genes are variably present in isolates of *P. aeruginosa*, being the chromosomal  
438 genes *exoS*, *exoT* and *exoY* distributed among almost all strains [16, 18, 23]. T3SS *exoS*,  
439 *exoT* and *exoY* genes were detected in 100%, 72.2% and 75.9%, respectively. *exoS* results  
440 are in accordance with the hypothesis of a wider distribution of this gene due to its  
441 chromosomal nature. Nevertheless, the fact of in nearly 30% of our isolates *exoT* and  
442 *exoY* genes were not detected and a significant absence of *exoY* gene among BSI isolates  
443 ( $P = 0.0435$ ) (Table 2) demonstrate a contrary trend to the hypothesis of their universal  
444 distribution among *P. aeruginosa* strains, as well as, several studies that rarely report  
445 absence of these genes [13, 15, 16, 55, 56, 70].

446 The *exoU* gene is found less frequently due to its presence being associated to the PAPI-  
447 2 in the accessory genome of *P. aeruginosa*, however, its presence and the secretion of  
448 its respective protein are markers of very highly cytotoxic phenotype and associated with  
449 several types of acute infections, antimicrobial resistance phenotype, polymicrobial  
450 infections and early mortality individuals [18, 31, 71, 72]. Moreover, *exoS/exoU* genes  
451 tend to be mutually exclusive, being observed a higher prevalence of the invasive  
452 virulotype (*exoS*<sup>+</sup>/*exoU*<sup>-</sup>) among *P. aeruginosa* strains worldwide [16, 19, 23, 59].  
453 Interestingly, 55.6% of our  isolates presented the invasive/cytotoxic virulotype  
454 (*exoS*<sup>+</sup>/*exoU*<sup>+</sup>). Highlighting the rare occurrence of this phenomenon, there are only a few  
455 studies reporting a high proportion of this virulotype among *P. aeruginosa* hospital  
456 isolates [15, 35, 55]. We also observed a significant absence of *exoS*<sup>+</sup>/*exoU*<sup>+</sup> virulotype  
457 among BSI isolates ( $p= 0.0027$ ) and in the NICU ( $p= 0.0461$ ), ward in which occurred  
458 the majority of BSI episodes among admitted patients (10/12 – 83.3%) (Tables 1 and 2),  
459 contradicting the important association established by several authors between the  
460 presence of *exoS*<sup>+</sup>/*exoU*<sup>+</sup> virulotype among BSI isolates [18, 55, 73, 74]. Despite reports,  
461 the concomitant presence of genes still is not well understood, considering: (I) absence  
462 of a direct relationship between the genes, where *exoS*, *exoT* and *exoY* are found in the  
463 core genome of *P. aeruginosa*, while *exoU* is found associated to the PAPI-2 in the  
464 accessory genome; (II) the impact on bacterial fitness due to the presence of both genes,  
465 which would stimulate the loss of one of them; and (III) the production of both toxins  
466 could generate a higher immune response, making the pathogen less capable of  
467 establishing infection due to its high immunogenicity [13, 16, 19, 23, 71].

468 Our findings revealed that more of 66% of our  isolates were resistant to carbapenems,  
469 followed by high resistance to cephalosporins, fluoroquinolones and aminoglycosides.

470 Moreover, 40.7% of  isolates were classified as MDR or XDR, which were  
471 significantly predominant in the AICU ( $P = 0.0003$ ) (Table 3) and associated to  
472 genetically related clonal groups ( $P = 0.0141$ ) (Table 6). For instance, our findings agree  
473 with recent data reported by Santos et al. (2019) [20], which also showed an increasing  
474 trend on resistance  carbapenems, aminoglycosides and fluoroquinolones associated to  
475 spread of *P. aeruginosa* MDR/XDR strains over 21 years' period in Rio de Janeiro,  
476 Brazil. Others studies conducted in Brazil and Latin America also revealed high resistance  
477 rates to cephalosporins, fluoroquinolones and aminoglycosides [75–78]. These findings  
478 emphasize the growing global trend on antibiotic resistance been reported by several  
479 studies and rises concern, especially in Latin America countries, where carbapenems still  
480 remains as the main choice for the treatment of infections by MDR *P. aeruginosa* [21,  
481 22, 23, 79, 80]. A reduced number of transmissible resistance markers were detected  
482 among  isolates, with *bla*<sub>CTX-M1</sub> (20.4% – 11/54) as the most frequent, followed by  
483 *bla*<sub>SPM-1</sub> (5/54 – 9.2%), *bla*<sub>OXA-2</sub> (3/54 – 5.5%) and *bla*<sub>OXA-10</sub> (3/54 – 5.5%). Our data  
484 demonstrate the predomination and wide spread of SPM-1 MDR/XDR strains in Brazilian  
485 hospitals and with the increasing transmission trend of ESBLs CTX-M and OXA variants  
486 genes worldwide, as previously reported [20, 23, 45, 76, 81, 82]. Finally, our results  
487 highlight the impact of horizontally acquired resistance mechanisms, mainly ESBLs and  
488 class B MBL, in the increasing resistance rates and its commonly association to  
489 MDR/XDR *P. aeruginosa* strains [18, 21, 23, 79].

490 The interaction between virulence and antibiotic susceptibility has been subject of several  
491 studies, suggesting that these relationships are antagonistic, since the presence of  
492 resistance mechanisms can determine a compromising biological cost for bacterial  
493 virulence and vice versa. In fact, the acquisition of resistance genes through the

494 incorporation of mobile genetic elements in the bacterial chromosome can lead to the  
495 inactivation of genes involved in the production of some virulence factors and decreased  
496 cytotoxicity [23, 72, 74, 83]. Nevertheless, other authors suggest that *exoU*<sup>+</sup> virulotype is  
497 associated  resistance to fluoroquinolones and carbapenems, pointing out that the  
498 relationship between virulence and resistance may also occur in a synergistic sense,  
499 especially in high antibiotic pressure settings, such as ICUs [9, 13, 15, 16, 84]. In spite of  
500 that, our data do not suggest this association, as the presence of T3SS virulotypes was not  
501 related to any antimicrobial class or resistance phenotype (Table 4). Yet, 40% of  
502 *exoS*<sup>+</sup>/*exoU*<sup>+</sup> isolates were associated to MDR/XDR phenotype, rising concern as a high  
503 prevalence of *exoS*<sup>+</sup>/*exoU*<sup>+</sup> could facilitate the virulotype transmission to other  
504 MDR/XDR isolates, worsening the clinical scenario in the growing trend dissemination  
505 highly virulent MDR/XDR strains.

506 MLST revealed the presence of 22 different STs, including four different HRC (ST111,  
507 ST235, ST244 and ST277), seven newly identified STs and a novel allele related to *aroE*  
508 gene, demonstrating the high genetic diversity and an absence of relationship among most  
509 of our studied *P. aeruginosa* strains. Such findings are also in line with those obtained by  
510 rep-PCR genotyping, which revealed the presence of 36 fingerprints, 26 of which are  
511 unrelated (Figs 1 and 2). This high genetic diversity may be explained as the study site is  
512 a regional reference hospital for several specialties. It is likely that inter-hospital transit  
513 patients and/or who spend short periods in the hospital environment, as well as healthcare  
514 professionals, carry isolates and insert them in the hospital environment, and  
515 consequently causing infections in ICU patients because of numerous risk factors, such  
516 as immunosuppression conditions and virulence potential of isolates. Our data also  
517 corroborate the hypothesis of epidemic non-clonal population structure of *P. aeruginosa*,

518 indicating the dispersion of global HRC in hospitals settings and the continuous  
519 description of new *P. aeruginosa* STs worldwide [15, 23, 55, 56, 76, 85, 86].

520 Contrary to the predominance in other studies, HRC were associated with only 40% of  
521 our isolates [18, 23]. However, such strains demonstrate significantly association  
522 MDR/XDR phenotypes, carriage of resistance markers and persistence in ICUs (Table 5).  
523 ST111 has been detected in all continents [23, 31] and in our study was associated to  
524 clonal group I, composed by two MDR/XDR from different periods, of which only one  
525 harboring was *bla*<sub>CTX-M1</sub> gene, suggesting the latter acquisition of this marker (Fig 2).  
526 ST235 is the most widely spread *P. aeruginosa* HRC associated MDR/XDR isolates and  
527 carriage various resistance markers [23, 87]. Of the five ST235 isolates were MDR/XDR,  
528 of which three comprised the clonal group D, dispersed in different ICUs and carrying  
529 the gene *bla*<sub>CTX-M1</sub> gene, and two unrelated isolates, of which one also harboring *bla*<sub>CTX-</sub>  
530 <sub>M1</sub> gene (Fig 2). Kos et al. (2015) [88] has also detected the presence of CTX-M β-  
531 lactamase in Brazilian ST235 isolates. ST244 also has a worldwide distribution, being  
532 associated to carriage of different resistance markers, but not always related to  
533 MDR/XDR isolates [23, 88, 89, 90]. High frequencies were also reported by Brazilian  
534 studies evaluating clinical and environmental isolates [20, 76, 91]. ST244 was the most  
535 prevalent HRC among our strains, being predominantly detected in AICU and mostly  
536 related to MDR/XDR isolates, except for one isolate presenting MultiS phenotype. Two  
537 of nine isolates comprised clonal group H/ST244, where *bla*<sub>CTX-M1</sub> was shared by both  
538 isolates and two comprised clonal group I/ST244; the other five isolates were genetically  
539 unrelated and three harbored *bla*<sub>CTX-M1</sub> gene (Fig 2). Endemic clone in Brazil, ST277 is  
540 frequently associated to MDR/XDR isolates and dissemination of *bla*<sub>SPM-1</sub> gene [20, 23,  
541 92]. Interestingly, isolates comprising clonal group A/ST277 shared *bla*<sub>SPM-1</sub>, but



542 harbored distinct *bla*<sub>OXA</sub> genes; one isolate of clonal group B/ST277 harbored both *bla*<sub>SPM-</sub>  
543 <sub>1</sub> and *bla*<sub>OXA-10</sub> genes, while the other harbored only *bla*<sub>OXA-10</sub> gene; isolates comprising  
544 clonal group C/ST277 shared *bla*<sub>SPM-1</sub>, but only one isolate harbored *bla*<sub>OXA-2</sub> (Fig 2). To  
545 our knowledge this is first report in Brazil of *P. aeruginosa* ST277 harboring both *bla*<sub>SPM-</sub>  
546 <sub>1</sub> and *bla*<sub>OXA</sub> variants genes.

547 Most of our isolates were identified as non-HCR, which among them non-resistant  
548 phenotypes (MultiS and ModR) were significantly predominant ( $P < 0.0001$ ) (Table 5),  
549 demonstrating that susceptible isolates are associated to higher clonal diversity [31].  
550 Clonal group E/ST1284 comprised three isolates, which curiously, the only isolate  
551 harboring *bla*<sub>CTX-M1</sub> was negative for *exoU* gene, suggesting a reduction in virulence due  
552 to acquisition of a resistance marker (Fig 2). ST508 isolate was the only non-HRC  
553 harboring a resistance gene (*bla*<sub>OXA-2</sub>) (Fig 2). Novel ST2554 was identified as DLV of  
554 HRC ST274, belonging to CC274. High-risk CC/ST274 strains have been recently  
555 detected in Indonesian ICUs, but are still predominant among CF patients, demonstrating  
556 high occurrence of mutation in genes related to antibiotic resistance [93, 94, 95]. ST2554  
557 isolate presented a ModR phenotype and *exoS*<sup>+</sup>/*exoU*<sup>+</sup> virulotype, also indicating  
558 acquisition of PAPI-2 containing *exoU* gene during divergence from ST274 (Fig 2). In  
559 spite of the non-detection of ST274 among our isolates, it may not rule out the presence  
560 of this genotype in the hospital, as we observe a more direct genetic relationship between  
561 both strains.

562 Certain clonal strains are expected to be linked to T3SS virulotypes. Recent phylogenetic  
563 analysis by Sawa et al. 2020 [19] attributed *exoU*<sup>+</sup> virulotype to ST253, possibly  
564 explaining the highest virulence potential of ST235 observed clinical studies [18, 23].  
565 Also, Sanchez-Diener et al. (2017) [72] on animal model based study showed that lower

566 virulence was linked to XDR profiles, which are typically found among HRC. However,  
567 different virulence potentials were observed among HRC, being higher for ST111 and  
568 ST235 and lower for ST175. Our MLST lineages were not significantly associated to  
569 specific T3SS virulotypes ( $P = 0.5820$ ) (Table 5), however, we observed the presence of  
570 *exoS*<sup>+</sup>/*exoU*<sup>+</sup> virulotype among the four detected HRC. Moreover, we observed isolates  
571 HRC ST244 and non-HRC ST508 harboring *exoS*<sup>+</sup>/*exoU*<sup>+</sup> virulotype, while they were  
572 expected to be linked the invasive *exoS*<sup>+</sup> virulotype as recently reported [19]. Therefore,  
573 our findings highlight the importance of virulence genotyping and suggest the local  
574 acquisition of PAPI-2 containing *exoU* gene by HRC, which could worsen the local  
575 clinical scenario as most of HCR were also MDR/XDR.

576 The elevated virulence and resistance potential presented by our isolates might negatively  
577 affect patient's outcomes, however the present study did not perform associations to  
578 clinical and epidemiological data due to unavailability of patients records. Moreover, we  
579 did not perform phenotypic tests evaluating secretion/expression of virulence factors such  
580 as elastases, proteases, T3SS exotoxins, QS molecules and the sequencing of the  
581 virulence genes, thus preventing a better establishment of genotype-phenotype  
582 relationships. Finally, the non-characterization of hospital environment isolates may have  
583 underestimated the genetic background in the study site, also impairing analysis of  
584 transmission from in-hospital environmental reservoirs. Studies comprising a larger  
585 number of clinical and environmental isolates from the study site and from other hospitals  
586 are highly recommended in order to better establish *P. aeruginosa* transmission in the  
587 region, as well as, relationships between of virulence, antibiotic susceptibility and genetic  
588 diversity.

589

## 590 **Conclusions**

591 To conclude, this is the first study deeply exploring virulence, antibiotic resistance and  
592 genetic background of *P. aeruginosa* isolates from ICUs at specialized hospital in the  
593 Brazilian Amazon region. Herein, we reported a high prevalence of virulence-related  
594 markers, particularly of the rare *exoS*<sup>+</sup>/*exoU*<sup>+</sup> virulotype, which may be associated to a  
595 high virulence and cytotoxic potential and transmission of genetic elements containing  
596 *exoU* gene among local isolates. It was also observed high percentages of resistance to  
597 different classes of antibiotics, particularly to carbapenems, in addition to MDR/XDR  
598 isolates harboring resistance genetic elements, alerting to a possible dissemination of  
599 these mechanisms and of isolates acting as resistance reservoirs. The importance  
600 genotyping by rep-PCR and MLST techniques in the surveillance of in-hospital isolates  
601 was noteworthy, which demonstrated circulation of MDR/XDR HRC clones, emergence  
602 of novel genetic lineages and a wide genetic diversity of strains circulating in different  
603 ICUs. Finally, our findings may be useful on comprehension of complex mechanisms of  
604 pathogenicity process, treatment guidance and establishment of strategies to control the  
605 spread of epidemic *P. aeruginosa* strains with a high lethality potential.

## 606 **Acknowledgments**

607 We thank Dra. Ana Roberta Fusco da Costa and Msc. Alex Brito Souza for the technical  
608 assistance in the MLST sequencing of samples.

609 The present study will be presented by Yan Corrêa Rodrigues to obtain his Ph.D. within  
610 the doctoral programme 'Parasitic biology in Amazon Region' at the State University of  
611 Pará, Brazil.

## 612 **References**

- 613 1. Hassuna NA, Mandour SA, Mohamed ES. Virulence Constitution of Multi-Drug-  
614 Resistant *Pseudomonas aeruginosa* in Upper Egypt. *Infect Drug Resist.* 2020;13:587-  
615 95.
- 616 2. Braga IA, Campos PA, Gontijo-Filho PP, Ribas RM. Multi-hospital point prevalence  
617 study of healthcare-associated infections in 28 adult intensive care units in Brazil. *J*  
618 *Hosp Infect.* 2018;99(3):318-24.
- 619 3. Berezin EN, Solorzano F, Latin America Working Group on Bacterial R. Gram-  
620 negative infections in pediatric and neonatal intensive care units of Latin America. *J*  
621 *Infect Dev Ctries.* 2014;8(8):942-53.
- 622 4. Luna CM, Rodriguez-Noriega E, Bavestrello L, Guzman-Blanco M. Gram-negative  
623 infections in adult intensive care units of latin america and the Caribbean. *Crit Care*  
624 *Res Pract.* 2014;2014:480463.
- 625 5. Haque M, Sartelli M, McKimm J, Abu Bakar M. Health care-associated infections -  
626 an overview. *Infect Drug Resist.* 2018;11:2321-33.
- 627 6. Russotto V, Cortegiani A, Graziano G, Saporito L, Raineri SM, Mammina C, et al.  
628 Bloodstream infections in intensive care unit patients: distribution and antibiotic  
629 resistance of bacteria. *Infect Drug Resist.* 2015;8:287-96.
- 630 7. Suarez C, Pena C, Tubau F, Gavalda L, Manzur A, Dominguez MA, et al. Clinical  
631 impact of imipenem-resistant *Pseudomonas aeruginosa* bloodstream infections. *J*  
632 *Infect.* 2009;58(4):285-90.
- 633 8. Rodrigues YC, Sarges ESNF, Conceição ML, Matos ECO, Gomes NJP, Quaresma  
634 AJG, Lima KVB. Infecções por *Pseudomonas aeruginosa*: aspectos clínicos,

- 635 microbiológicos e moleculares. In: Salgado YCS, organizer. Patologia das doenças.  
636 4th ed. Ponta Grossa (PR): Atena Editora; 2018. pp. 53-69. Portuguese.
- 637 9. Cho HH, Kwon KC, Kim S, Koo SH. Correlation between virulence genotype and  
638 fluoroquinolone resistance in carbapenem-resistant *Pseudomonas aeruginosa*. Ann  
639 Lab Med. 2014;34(4):286-92.
- 640 10. Gellatly SL, Hancock RE. *Pseudomonas aeruginosa*: new insights into pathogenesis  
641 and host defenses. Pathog Dis. 2013;67(3):159-73.
- 642 11. Jabalameli F, Mirsalehian A, Khoramian B, Aligholi M, Khoramrooz SS, Asadollahi  
643 P, et al. Evaluation of biofilm production and characterization of genes encoding type  
644 III secretion system among *Pseudomonas aeruginosa* isolated from burn patients.  
645 Burns. 2012;38(8):1192-7.
- 646 12. Senturk S, Ulusoy S, Bosgelmez-Tinaz G, Yagci A. Quorum sensing and virulence  
647 of *Pseudomonas aeruginosa* during urinary tract infections. J Infect Dev Ctries.  
648 2012;6(6):501-7.
- 649 13. Bradbury RS, Roddam LF, Merritt A, Reid DW, Champion AC. Virulence gene  
650 distribution in clinical, nosocomial and environmental isolates of *Pseudomonas*  
651 *aeruginosa*. J Med Microbiol. 2010;59(Pt 8):881-90.
- 652 14. Lombardi C, Tolchard J, Bouillot S, Signor L, Gebus C, Liebl D, et al. Structural and  
653 Functional Characterization of the Type Three Secretion System (T3SS) Needle of  
654 *Pseudomonas aeruginosa*. Front Microbiol. 2019;10:573.
- 655 15. Horna G, Amaro C, Palacios A, Guerra H, Ruiz J. High frequency of the  
656 *exoU*<sup>+</sup>/*exoS*<sup>+</sup> genotype associated with multidrug-resistant "high-risk clones" of  
657 *Pseudomonas aeruginosa* clinical isolates from Peruvian hospitals. Sci Rep.  
658 2019;9(1):10874.

- 659 16. Sawa T, Shimizu M, Moriyama K, Wiener-Kronish JP. Association between  
660 *Pseudomonas aeruginosa* type III secretion, antibiotic resistance, and clinical  
661 outcome: a review. Crit Care. 2014;18(6):668.
- 662 17. Hauser AR. The type III secretion system of *Pseudomonas aeruginosa*: infection by  
663 injection. Nat Rev Microbiol. 2009;7(9):654-65.
- 664 18. Pena C, Cabot G, Gomez-Zorrilla S, Zamorano L, Ocampo-Sosa A, Murillas J, et al.  
665 Influence of virulence genotype and resistance profile in the mortality of  
666 *Pseudomonas aeruginosa* bloodstream infections. Clin Infect Dis. 2015;60(4):539-  
667 48.
- 668 19. Sawa T, Momiyama K, Mihara T, Kainuma A, Kinoshita M, Moriyama K. Molecular  
669 epidemiology of clinically high-risk *Pseudomonas aeruginosa* strains: Practical  
670 overview. Microbiol Immunol. 2020;64(5):331-44.
- 671 20. de Oliveira Santos IC, Pereira de Andrade NF, da Conceicao Neto OC, da Costa BS,  
672 de Andrade Marques E, Rocha-de-Souza CM, et al. Epidemiology and antibiotic  
673 resistance trends in clinical isolates of *Pseudomonas aeruginosa* from Rio de Janeiro  
674 - Brazil: Importance of mutational mechanisms over the years (1995-2015). Infect  
675 Genet Evol. 2019;73:411-5.
- 676 21. Matos ECO, Andriolo RB, Rodrigues YC, Lima PDL, Carneiro I, Lima KVB.  
677 Mortality in patients with multidrug-resistant *Pseudomonas aeruginosa* infections: a  
678 meta-analysis. Rev Soc Bras Med Trop. 2018;51(4):415-20.
- 679 22. Hong DJ, Bae IK, Jang IH, Jeong SH, Kang HK, Lee K. Epidemiology and  
680 Characteristics of Metallo-beta-Lactamase-Producing *Pseudomonas aeruginosa*.  
681 Infect Chemother. 2015;47(2):81-97.

- 682 23. Oliver A, Mulet X, Lopez-Causape C, Juan C. The increasing threat of *Pseudomonas*  
683 *aeruginosa* high-risk clones. *Drug Resist Updat.* 2015;21-22:41-59.
- 684 24. Yezli S, Shibl AM, Memish ZA. The molecular basis of beta-lactamase production in  
685 Gram-negative bacteria from Saudi Arabia. *J Med Microbiol.* 2015;64(Pt 2):127-36.
- 686 25. Martins AF, Zavascki AP, Gaspareto PB, Barth AL. Dissemination of *Pseudomonas*  
687 *aeruginosa* producing SPM-1-like and IMP-1-like metallo-beta-lactamases in  
688 hospitals from southern Brazil. *Infection.* 2007;35(6):457-60.
- 689 26. Livermore DM. Multiple mechanisms of antimicrobial resistance in *Pseudomonas*  
690 *aeruginosa*: our worst nightmare? *Clin Infect Dis.* 2002;34(5):634-40.
- 691 27. Liu H, Kong W, Yang W, Chen G, Liang H, Zhang Y. Multilocus sequence typing  
692 and variations in the oprD gene of *Pseudomonas aeruginosa* isolated from a hospital  
693 in China. *Infect Drug Resist.* 2018;11:45-54
- 694 28. Maâtallah M, Bakhrouf A, Habeeb MA, Turlej-Rogacka A, Iversen A, Pourcel C, et  
695 al. Four genotyping schemes for phylogenetic analysis of *Pseudomonas aeruginosa*:  
696 comparison of their congruence with multi-locus sequence typing. *PLoS One.* 2013  
697 ;8(12):e82069. Erratum in: *PLoS One.* 2015;10(9):e0137931.
- 698 29. Achtman M. Evolution, population structure, and phylogeography of genetically  
699 monomorphic bacterial pathogens. *Annu Rev Microbiol.* 2008;62:53-70.
- 700 30. Feil EJ, Enright MC. Analyses of clonality and the evolution of bacterial pathogens.  
701 *Curr Opin Microbiol.* 2004;7(3):308-13.
- 702 31. Mulet X, Cabot G, Ocampo-Sosa AA, Dominguez MA, Zamorano L, Juan C, et al.  
703 Biological markers of *Pseudomonas aeruginosa* epidemic high-risk clones.  
704 *Antimicrob Agents Chemother.* 2013;57(11):5527-35.

- 705 32. Woodford N, Turton JF, Livermore DM. Multiresistant Gram-negative bacteria: the  
706 role of high-risk clones in the dissemination of antibiotic resistance. *FEMS Microbiol*  
707 *Rev.* 2011;35(5):736-55.
- 708 33. Wozniak DJ, Ohman DE. Transcriptional analysis of the *Pseudomonas aeruginosa*  
709 genes *algR*, *algB*, and *algD* reveals a hierarchy of alginate gene expression which is  
710 modulated by *algT*. *J Bacteriol.* 1994;176(19):6007-14.
- 711 34. Schurr MJ, Martin DW, Mudd MH, Deretic V. Gene cluster controlling conversion  
712 to alginate-overproducing phenotype in *Pseudomonas aeruginosa*: functional  
713 analysis in a heterologous host and role in the instability of mucoidy. *J Bacteriol.*  
714 1994;176(11):3375-82.
- 715 35. Finnan S, Morrissey JP, O'Gara F, Boyd EF. Genome diversity of *Pseudomonas*  
716 *aeruginosa* isolates from cystic fibrosis patients and the hospital environment. *J Clin*  
717 *Microbiol.* 2004;42(12):5783-92.
- 718 36. Wolska K, Szweda P. Genetic features of clinical *Pseudomonas aeruginosa* strains.  
719 *Pol J Microbiol.* 2009;58(3):255-60.
- 720 37. Zhu H, Conibear TC, Bandara R, Aliwarga Y, Stapleton F, Willcox MD. Type III  
721 secretion system-associated toxins, proteases, serotypes, and antibiotic resistance of  
722 *Pseudomonas aeruginosa* isolates associated with keratitis. *Curr Eye Res.*  
723 2006;31(4):297-306.
- 724 38. Sabharwal N, Dhall S, Chhibber S, Harjai K. Molecular detection of virulence genes  
725 as markers in *Pseudomonas aeruginosa* isolated from urinary tract infections. *Int J*  
726 *Mol Epidemiol Genet.* 2014;5(3):125-34.



- 727 39. Clinical and Laboratory Standards Institute. Performance Standards for Antimicrobial  
728 Susceptibility Testing: Approved Twenty-: Document M100-S28. Wayne, PA, USA:  
729 CLSI, 2018.
- 730 40. Magiorakos AP, Srinivasan A, Carey RB, Carmeli Y, Falagas ME, Giske CG, et al.  
731 Multidrug-resistant, extensively drug-resistant and pandrug-resistant bacteria: an  
732 international expert proposal for interim standard definitions for acquired resistance.  
733 Clin Microbiol Infect. 2012;18(3):268-81.
- 734 41. Bonnet R, Sampaio JL, Labia R, De Champs C, Sirot D, Chanal C, et al. A novel  
735 CTX-M beta-lactamase (CTX-M-8) in cefotaxime-resistant Enterobacteriaceae  
736 isolated in Brazil. Antimicrob Agents Chemother. 2000;44(7):1936-42.
- 737 42. Bert F, Branger C, Lambert-Zechovsky N. Identification of PSE and OXA beta-  
738 lactamase genes in *Pseudomonas aeruginosa* using PCR-restriction fragment length  
739 polymorphism. J Antimicrob Chemother. 2002;50(1):11-8.
- 740 43. Gonçalves DCPS, Lima ABM, Leão LSNO, Carmo Filho JR, Pimenta FC, Vieira  
741 JOG. Detecção de metalo-beta-lactamase em *Pseudomonas aeruginosa* isoladas de  
742 pacientes hospitalizados em Goiânia, Estado de Goiás. Rev Soc Bras Med Trop. 2009;  
743 42:411-414. Portuguese.
- 744 44. Poirel L, Naas T, Nicolas D, Collet L, Bellais S, Cavallo JD, et al. Characterization  
745 of VIM-2, a carbapenem-hydrolyzing metallo-beta-lactamase and its plasmid- and  
746 integron-borne gene from a *Pseudomonas aeruginosa* clinical isolate in France.  
747 Antimicrob Agents Chemother. 2000;44(4):891-7.
- 748 45. Gales AC, Menezes LC, Silbert S, Sader HS. Dissemination in distinct Brazilian  
749 regions of an epidemic carbapenem-resistant *Pseudomonas aeruginosa* producing  
750 SPM metallo-beta-lactamase. J Antimicrob Chemother. 2003;52(4):699-702.

- 751 46. Nordmann P, Poirel L, Carrer A, Toleman MA, Walsh TR. How to detect NDM-1  
752 producers. *J Clin Microbiol.* 2011;49(2):718-21.
- 753 47. Lomaestro BM, Tobin EH, Shang W, Gootz T. The spread of *Klebsiella pneumoniae*  
754 carbapenemase-producing *K. pneumoniae* to upstate New York. *Clin Infect Dis.*  
755 2006;43(3):e26-8.
- 756 48. Curran B, Jonas D, Grundmann H, Pitt T, Dowson CG. Development of a multilocus  
757 sequence typing scheme for the opportunistic pathogen *Pseudomonas aeruginosa*. *J*  
758 *Clin Microbiol.* 2004;42(12):5644-9.
- 759 49. Francisco AP, Vaz C, Monteiro PT, Melo-Cristino J, Ramirez M, Carrico JA.  
760 PHYLOViZ: phylogenetic inference and data visualization for sequence based typing  
761 methods. *BMC Bioinformatics.* 2012;13:87.
- 762 50. Ayres M, Ayres Júnior M, Ayres DL, Santos AS. *BioEstat 5.0. Aplicações estatísticas*  
763 *nas áreas das Ciências Bio-Médicas. Belém (PA): Instituto de Desenvolvimento*  
764 *Sustentável Mamirauá; 2008. Portuguese.*
- 765 51. Brasil, Conselho Nacional de Saúde. Resolução Nº 466, de 12 de dezembro de 2012.  
766 Brasília. Available from: <http://conselho.saude.gov.br/resolucoes/2012/Reso466.pdf>.  
767 Acesso em 14.May.2020.
- 768 52. Matos EC, Matos HJ, Conceicao ML, Rodrigues YC, Carneiro IC, Lima KV. Clinical  
769 and microbiological features of infections caused by *Pseudomonas aeruginosa* in  
770 patients hospitalized in intensive care units. *Rev Soc Bras Med Trop.* 2016;49(3):305-  
771 11.
- 772 53. Royer S, Faria AL, Seki LM, Chagas TP, Campos PA, Batistao DW, et al. Spread of  
773 multidrug-resistant *Acinetobacter baumannii* and *Pseudomonas aeruginosa* clones in

- 774 patients with ventilator-associated pneumonia in an adult intensive care unit at a  
775 university hospital. *Braz J Infect Dis.* 2015;19(4):350-7.
- 776 54. Kipnis E, Sawa T, Wiener-Kronish J. Targeting mechanisms of *Pseudomonas*  
777 *aeruginosa* pathogenesis. *Med Mal Infect.* 2006;36(2):78-91.
- 778 55. Morales-Espinosa R, Delgado G, Espinosa LF, Isselo D, Méndez JL, Rodriguez C,  
779 Miranda G, Cravioto A. Fingerprint Analysis and Identification of Strains ST309 as  
780 a Potential High Risk Clone in a *Pseudomonas aeruginosa* Population Isolated from  
781 Children with Bacteremia in Mexico City. *Front Microbiol.* 2017;8:313.
- 782 56. Ruiz-Roldan L, Belles A, Bueno J, Azcona-Gutierrez JM, Rojo-Bezares B, Torres C,  
783 et al. *Pseudomonas aeruginosa* Isolates from Spanish Children: Occurrence in Faecal  
784 Samples, Antimicrobial Resistance, Virulence, and Molecular Typing. *Biomed Res*  
785 *Int.* 2018;2018:8060178.
- 786 57. Fazeli N, Momtaz H. Virulence Gene Profiles of Multidrug-Resistant *Pseudomonas*  
787 *aeruginosa* Isolated From Iranian Hospital Infections. *Iran Red Crescent Med J.*  
788 2014;16(10):e15722.
- 789 58. Stacey SD, Pritchett CL. *Pseudomonas aeruginosa* AlgU Contributes to  
790 Posttranscriptional Activity by Increasing rsmA Expression in a mucA22 Strain. *J*  
791 *Bacteriol.* 2016;198(13):1812-26.
- 792 59. Lomholt JA, Poulsen K, Kilian M. Epidemic population structure of *Pseudomonas*  
793 *aeruginosa*: evidence for a clone that is pathogenic to the eye and that has a distinct  
794 combination of virulence factors. *Infect Immun.* 2001;69(10):6284-95.
- 795 60. Ballok AE, O'Toole GA. Pouring salt on a wound: *Pseudomonas aeruginosa*  
796 virulence factors alter Na<sup>+</sup> and Cl<sup>-</sup> flux in the lung. *J Bacteriol.* 2013;195(18):4013-  
797 9.

- 798 61. Laarman AJ, Bardeel BW, Ruyken M, Fernie J, Milder FJ, van Strijp JA, et al.  
799 *Pseudomonas aeruginosa* alkaline protease blocks complement activation via the  
800 classical and lectin pathways. *J Immunol.* 2012;188(1):386-93.
- 801 62. Mitov I, Strateva T, Markova B. Prevalence of virulence genes among bulgarian  
802 nosocomial and cystic fibrosis isolates of *Pseudomonas aeruginosa*. *Braz J Microbiol.*  
803 2010;41(3):588-95.
- 804 63. Najafi K, Kafil HS, Shokrian S, Azimi S, Asgharzadeh M, Yousefi M, et al. Virulence  
805 genes and antibiotic resistance profile of *Pseudomonas aeruginosa* isolates in  
806 Northwest of Iran. *Journal of Pure and Applied Microbiology.* 2015;(9):383- 389.
- 807 64. Matsumoto K. Role of bacterial proteases in pseudomonal and serratial keratitis. *Biol*  
808 *Chem.* 2004;385(11):1007-16.
- 809 65. Du X, Youle RJ, FitzGerald DJ, Pastan I. *Pseudomonas* exotoxin A-mediated  
810 apoptosis is Bak dependent and preceded by the degradation of Mcl-1. *Mol Cell Biol.*  
811 2010;30(14):3444-52.
- 812 66. Finlayson EA, Brown PD. Comparison of antibiotic resistance and virulence factors  
813 in pigmented and non-pigmented *Pseudomonas aeruginosa*. *West Indian Med J.*  
814 2011;60(1):24-32.
- 815 67. Lau GW, Hassett DJ, Ran H, Kong F. The role of pyocyanin in *Pseudomonas*  
816 *aeruginosa* infection. *Trends Mol Med.* 2004;10(12):599-606.
- 817 68. Dekimpe V, Deziel E. Revisiting the quorum-sensing hierarchy in *Pseudomonas*  
818 *aeruginosa*: the transcriptional regulator RhlR regulates LasR-specific factors.  
819 *Microbiology.* 2009;155(Pt 3):712-23.

- 820 69. Aboushleib HM, Omar HM, Abozahra R, Elsheredy A, Baraka K. Correlation of  
821 quorum sensing and virulence factors in *Pseudomonas aeruginosa* isolates in Egypt.  
822 J Infect Dev Ctries. 2015;9(10):1091-9.
- 823 70. Hu P, Chen J, Chen Y, Zhou T, Xu X, Pei X. Molecular epidemiology, resistance, and  
824 virulence properties of *Pseudomonas aeruginosa* cross-colonization clonal isolates in  
825 the non-outbreak setting. Infect Genet Evol. 2017;55:288-96.
- 826 71. Gomez-Zorrilla S, Juan C, Cabot G, Camoez M, Tubau F, Oliver A, et al. Impact of  
827 multidrug resistance on the pathogenicity of *Pseudomonas aeruginosa*: in vitro and  
828 in vivo studies. Int J Antimicrob Agents. 2016;47(5):368-74.
- 829 72. Sánchez-Diener I, Zamorano L, López-Causapé C, Cabot G, Mulet X, Peña C, et al.  
830 Interplay among Resistance Profiles, High-Risk Clones, and Virulence in the  
831 Caenorhabditis elegans *Pseudomonas aeruginosa* Infection Model. Antimicrob  
832 Agents Chemother. 2017;61(12):e01586-17.
- 833 73. Pobiega M, Chmielarczyk A, Koziół J, Pomorska-Wesolowska M, Ziolkowski G,  
834 Romaniszyn D, et al. Virulence factors genes and drug resistance in *Pseudomonas*  
835 *aeruginosa* strains derived from different forms of community and healthcare  
836 associated infections. Postępy Higieny i Medycyny Doświadczalnej. 2018;72:751-9.
- 837 74. Recio R, Sanchez-Diener I, Viedma E, Melendez-Carmona MA, Villa J, Orellana  
838 MA, et al. Pathogenic characteristics of *Pseudomonas aeruginosa* bacteraemia  
839 isolates in a high-endemicity setting for ST175 and ST235 high-risk clones. Eur J Clin  
840 Microbiol Infect Dis. 2020;39(4):671-8.
- 841 75. de Almeida Silva KCF, Calomino MA, Deutsch G, de Castilho SR, de Paula GR,  
842 Esper LMR, et al. Molecular characterization of multidrug-resistant (MDR)  
843 *Pseudomonas aeruginosa* isolated in a burn center. Burns. 2017;43(1):137-43.

- 844 76. Cacci LC, Chuster SG, Martins N, Carmo PR, Girão VB, Nouér SA, et al.  
845 Mechanisms of carbapenem resistance in endemic *Pseudomonas aeruginosa* isolates  
846 after an SPM-1 metallo- $\beta$ -lactamase producing strain subsided in an intensive care  
847 unit of a teaching hospital in Brazil. Mem Inst Oswaldo Cruz. 2016;111(9):551-8..
- 848 77. Sader HS, Jones RN, Gales AC, Silva JB, Pignatari AC; SENTRY Participants Group  
849 (Latin America). SENTRY antimicrobial surveillance program report: Latin  
850 American and Brazilian results for 1997 through 2001. Braz J Infect Dis. 2004  
851 Feb;8(1):25-79.
- 852 78. Pellegrino FL, Teixeira LM, Carvalho Md Mda G, Aranha Nouer S, Pinto De Oliveira  
853 M, Mello Sampaio JL, et al. Occurrence of a multidrug-resistant *Pseudomonas*  
854 *aeruginosa* clone in different hospitals in Rio de Janeiro, Brazil. J Clin Microbiol.  
855 2002;40(7):2420-4.
- 856 79. Labarca JA, Salles MJ, Seas C, Guzman-Blanco M. Carbapenem resistance in  
857 *Pseudomonas aeruginosa* and *Acinetobacter baumannii* in the nosocomial setting in  
858 Latin America. Crit Rev Microbiol. 2016;42(2):276-92.
- 859 80. Hermes DM, Pormann Pitt C, Lutz L, Teixeira AB, Ribeiro VB, Netto B, et al.  
860 Evaluation of heteroresistance to polymyxin B among carbapenem-susceptible and -  
861 resistant *Pseudomonas aeruginosa*. J Med Microbiol. 2013;62(Pt 8):1184-1189.
- 862 81. Poirel L, Bonnin RA, Nordmann P. Genetic support and diversity of acquired  
863 extended-spectrum beta-lactamases in Gram-negative rods. Infect Genet Evol.  
864 2012;12(5):883-93.
- 865 82. Bradford PA. Extended-spectrum beta-lactamases in the 21st century:  
866 characterization, epidemiology, and detection of this important resistance threat. Clin  
867 Microbiol Rev. 2001;14(4):933-51.

- 868 83. Cabot G, Lopez-Causape C, Ocampo-Sosa AA, Sommer LM, Dominguez MA,  
869 Zamorano L, et al. Deciphering the Resistome of the Widespread *Pseudomonas*  
870 *aeruginosa* Sequence Type 175 International High-Risk Clone through Whole-  
871 Genome Sequencing. *Antimicrob Agents Chemother.* 2016;60(12):7415-23.
- 872 84. Garey KW, Vo QP, Larocco MT, Gentry LO, Tam VH. Prevalence of type III  
873 secretion protein exoenzymes and antimicrobial susceptibility patterns from  
874 bloodstream isolates of patients with *Pseudomonas aeruginosa* bacteremia. *J*  
875 *Chemother.* 2008;20(6):714-20.
- 876 85. Cho HH, Kwon KC, Sung JY, Koo SH. Prevalence and genetic analysis of multidrug-  
877 resistant *Pseudomonas aeruginosa* ST235 isolated from a hospital in Korea, 2008-  
878 2012. *Ann Clin Lab Sci.* 2013;43(4):414-9.
- 879 86. Aguilar-Rodea P, Zuniga G, Rodriguez-Espino BA, Olivares Cervantes AL, Gamino  
880 Arroyo AE, Moreno-Espinosa S, et al. Identification of extensive drug resistant  
881 *Pseudomonas aeruginosa* strains: New clone ST1725 and high-risk clone ST233.  
882 *PLoS One.* 2017;12(3):e0172882.
- 883 87. Treepong P, Kos VN, Guyeux C, Blanc DS, Bertrand X, Valot B, et al. Global  
884 emergence of the widespread *Pseudomonas aeruginosa* ST235 clone. *Clin Microbiol*  
885 *Infect.* 2018;24(3):258-66.
- 886 88. Kos VN, Deraspe M, McLaughlin RE, Whiteaker JD, Roy PH, Alm RA, et al. The  
887 resistome of *Pseudomonas aeruginosa* in relationship to phenotypic susceptibility.  
888 *Antimicrob Agents Chemother.* 2015;59(1):427-36.
- 889 89. Del Barrio-Tofino E, Lopez-Causape C, Cabot G, Rivera A, Benito N, Segura C, et  
890 al. Erratum for del Barrio-Tofino et al., "Genomics and Susceptibility Profiles of

- 891 Extensively Drug-Resistant *Pseudomonas aeruginosa* Isolates from Spain".  
892 Antimicrob Agents Chemother. 2018;62(1).
- 893 90. Chen Y, Sun M, Wang M, Lu Y, Yan Z. Dissemination of IMP-6-producing  
894 *Pseudomonas aeruginosa* ST244 in multiple cities in China. Eur J Clin Microbiol  
895 Infect Dis. 2014;33(7):1181-7.
- 896 91. Miranda CC, de Filippis I, Pinto LH, Coelho-Souza T, Bianco K, Cacci LC, et al.  
897 Genotypic characteristics of multidrug-resistant *Pseudomonas aeruginosa* from  
898 hospital wastewater treatment plant in Rio de Janeiro, Brazil. J Appl Microbiol.  
899 2015;118(6):1276-86.
- 900 92. Silveira MC, Rocha-de-Souza CM, Albano RM, de Oliveira Santos IC, Carvalho-  
901 Assef APD. Exploring the success of Brazilian endemic clone *Pseudomonas*  
902 *aeruginosa* ST277 and its association with the CRISPR-Cas system type I-C. BMC  
903 Genomics. 2020;21(1):255.
- 904 93. Pelegrin AC, Saharman YR, Griffon A, Palmieri M, Mirande C, Karuniawati A, et al.  
905 High-Risk International Clones of Carbapenem-Nonsusceptible *Pseudomonas*  
906 *aeruginosa* Endemic to Indonesian Intensive Care Units: Impact of a Multifaceted  
907 Infection Control Intervention Analyzed at the Genomic Level. mBio. 2019;10(6).
- 908 94. Lopez-Causape C, Sommer LM, Cabot G, Rubio R, Ocampo-Sosa AA, Johansen HK,  
909 et al. Evolution of the *Pseudomonas aeruginosa* mutational resistome in an  
910 international Cystic Fibrosis clone. Sci Rep. 2017;7(1):5555.
- 911 95. Parkins MD, Somayaji R, Waters VJ. Epidemiology, Biology, and Impact of Clonal  
912 *Pseudomonas aeruginosa* Infections in Cystic Fibrosis. Clin Microbiol Rev.  
913 2018;31(4).
- 914



915 **Supporting information**

916 **S1 Table. Origin, resistance, genotyping and virulence data of the 54 *P. aeruginosa***  
917 **isolates from the referral hospital under study.**

918 \* Novel ST

919 <sup>a</sup> Novel *aroE* allele

920 ICU, intensive care unit; AICU, adult intensive care unit; PICU, pediatric intensive care unit; NICU,  
921 neonatal intensive care unit; RTI, respiratory tract infection; BSI, bloodstream infection; FEP, cefepime;  
922 IMP, imipenem; MER, meropenem; TZP, piperacillin+tazobactam; GN, gentamicin; CIP, ciprofloxacin;  
923 POL, polymyxin B; MultiS, susceptible to all tested antibiotics; ModR, moderately resistant; MDR, multi-  
924 drug resistant; XDR, extensively drug-resistant; ST, sequence type.

925 **S1 Fig. Prevalence of virulence-associated genes in the 54 *P. aeruginosa* isolates from**  
926 **the referral hospital under study.**

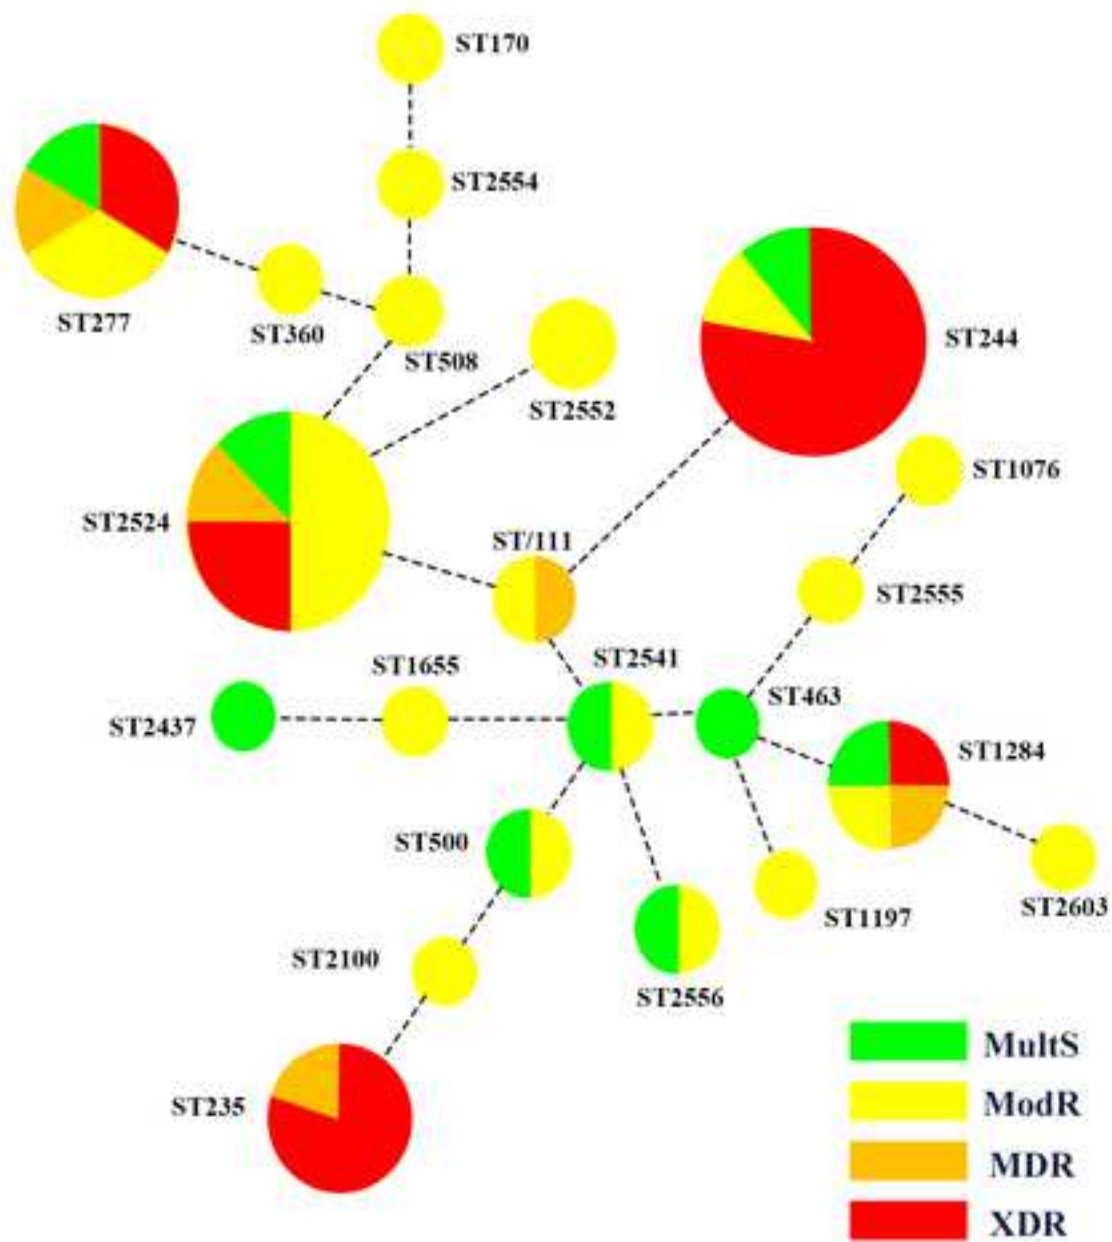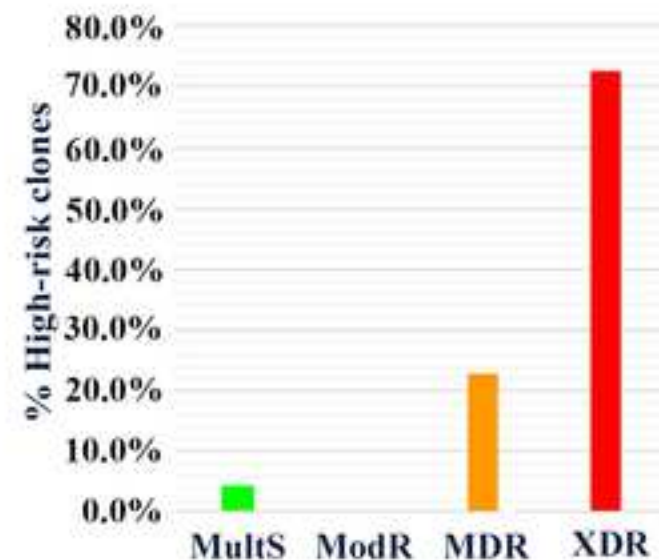

Figure 2\_Dendrogram

[Click here to download Figure Fig2.TIFF.tif](#)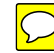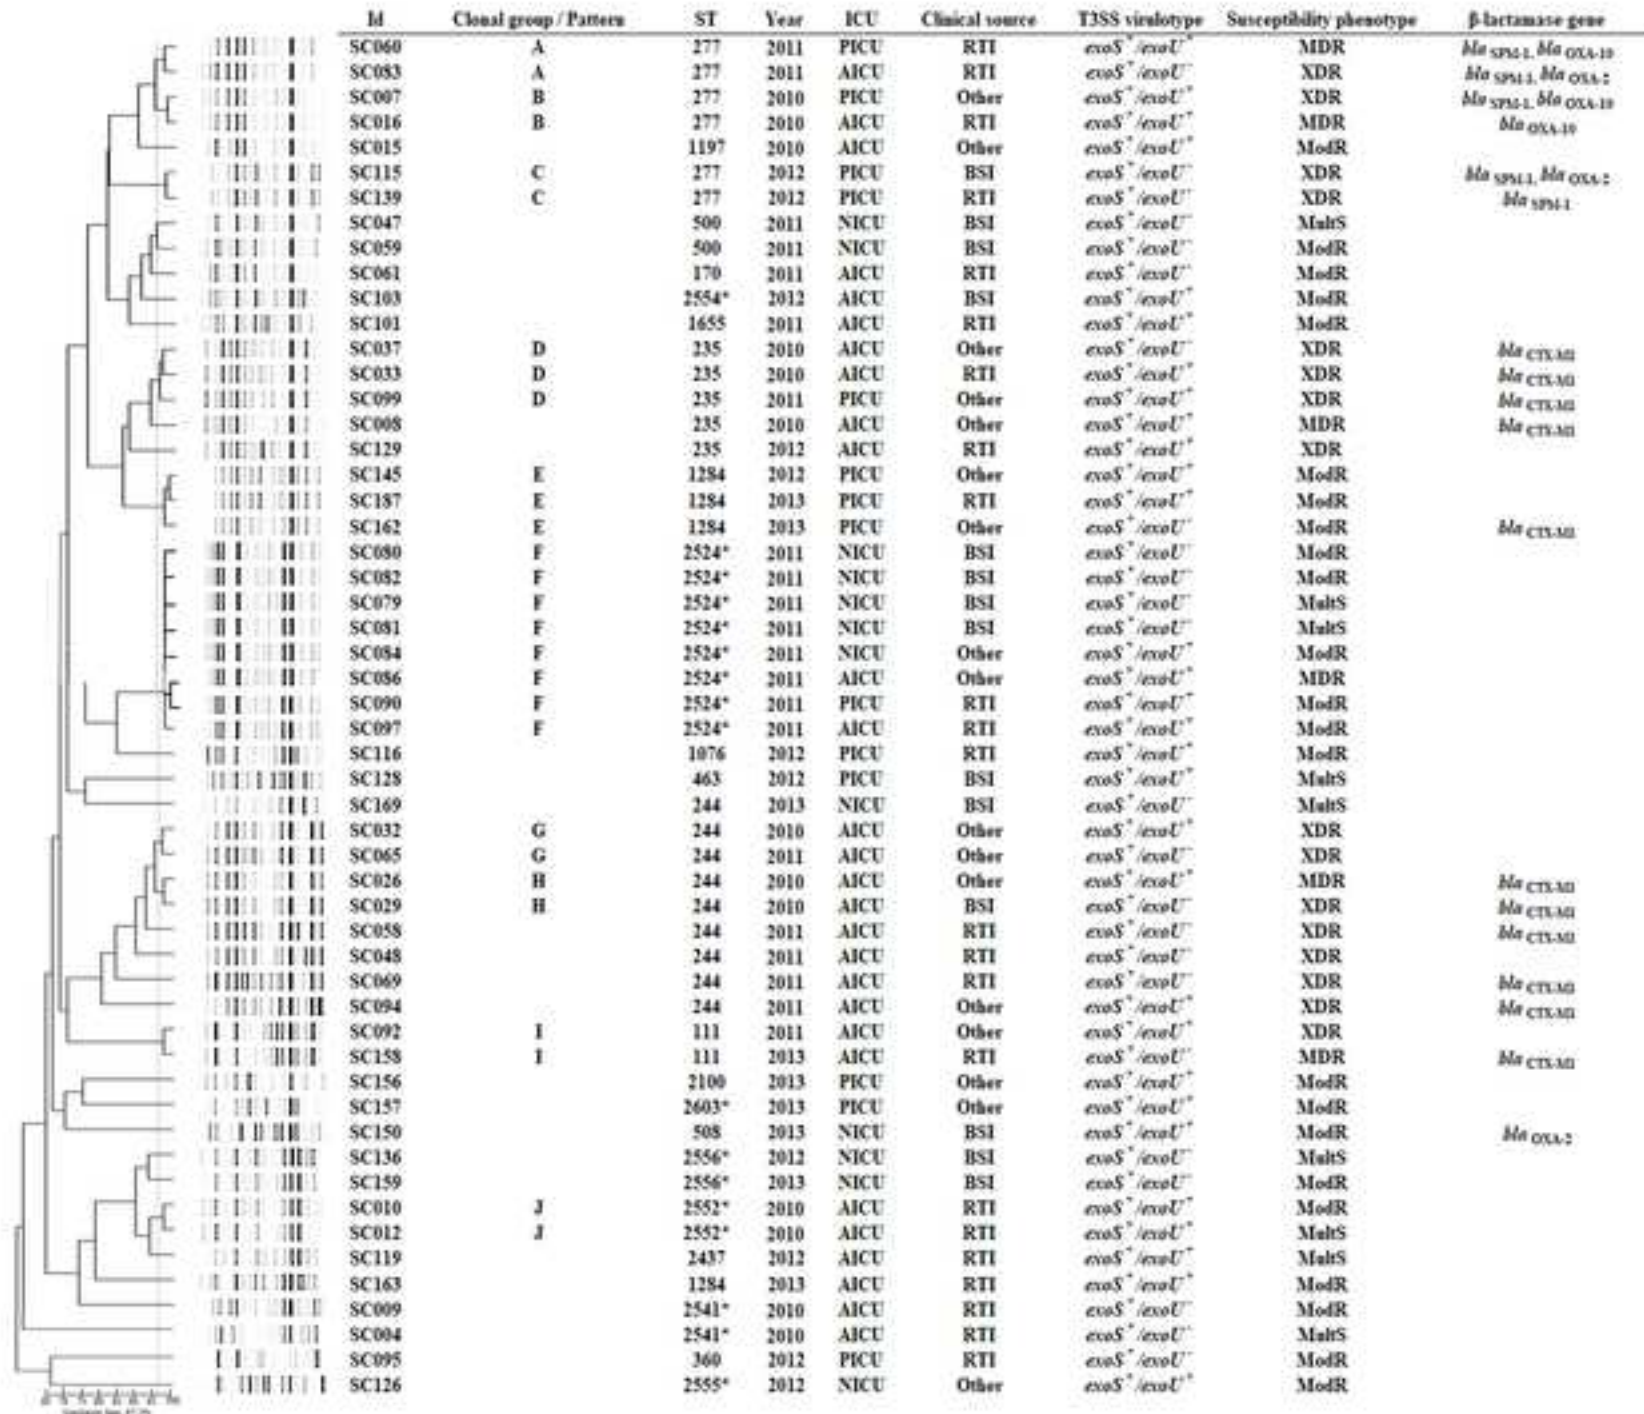

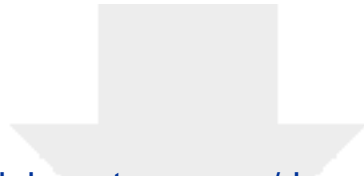

Click here to access/download  
**Supporting Information**  
S1\_Table.xlsx.xlsx

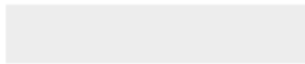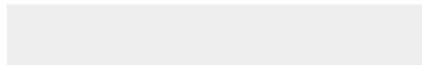



Click here to access/download  
**Supporting Information**  
S1\_Fig.TIFF.tif

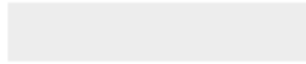

Supplement: pone.0238741.s003.pdf [file pone.0238741.s003.pdf]
